# Supplementary material
Source: ML conference proceedings conference paper supplement (https://aclanthology.org/2020.acl-main.405)

Dimension

Black  
(not black--black)

Gender  
(man--woman)

Evaluation  
(bad--good)

Potency  
(weak--strong)

thug

child

judge

secretary

Belief

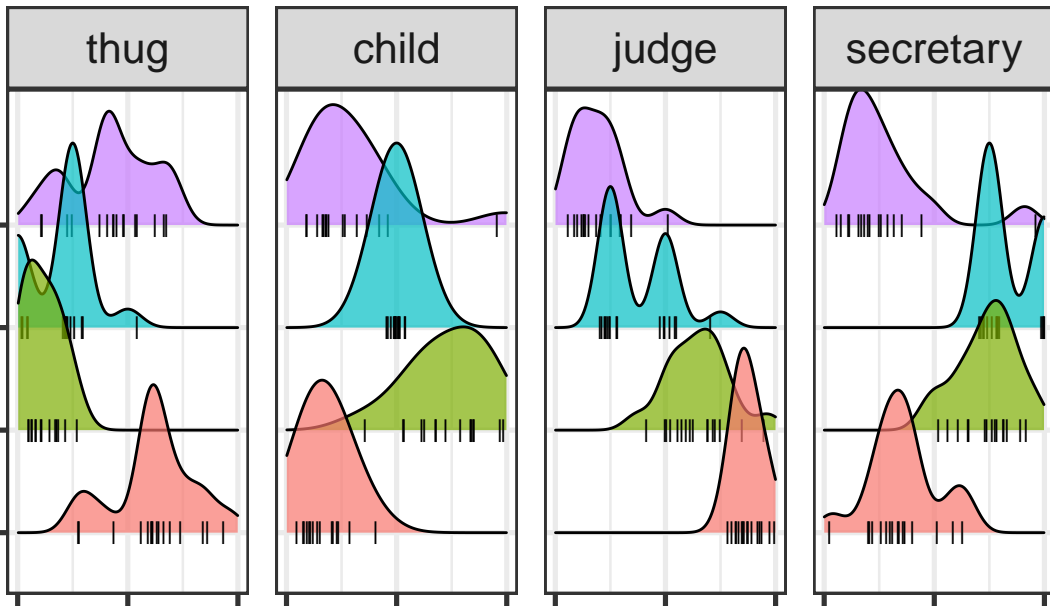

Supplement: Dataset [file 2020.acl-main.405.Dataset.zip]
