# Supplementary material
Source: ML conference proceedings conference paper supplement (https://aclanthology.org/2020.acl-main.405)
Supplement: Dataset [file 2020.acl-main.405.Dataset.zip]

% Correctly Ranked (Above or Below)

Agarwal Personality

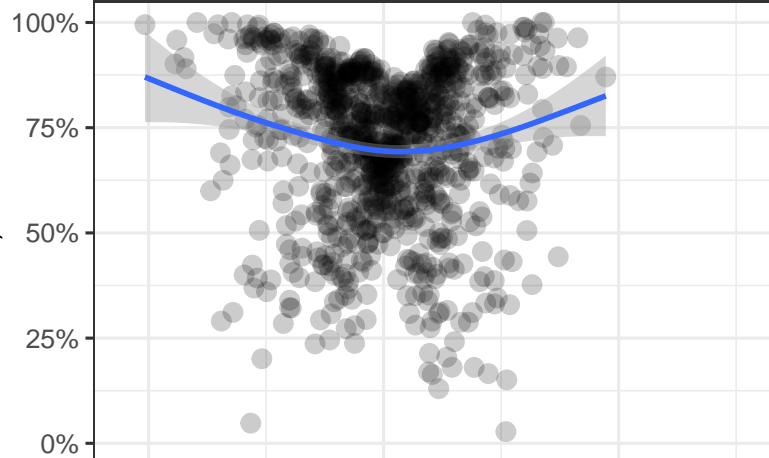

Bolukbasi et al.

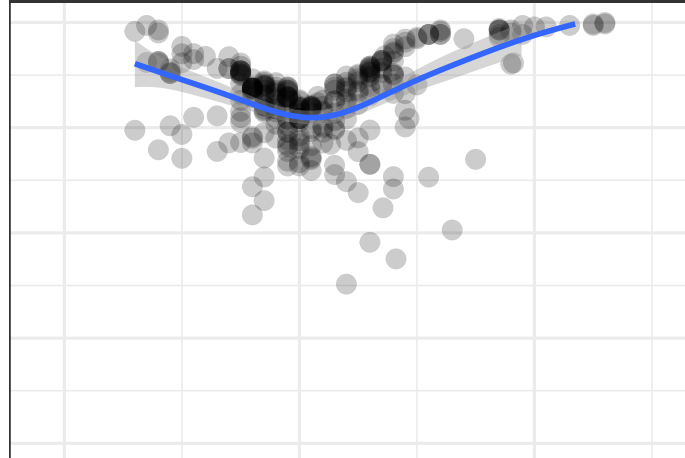

This Paper

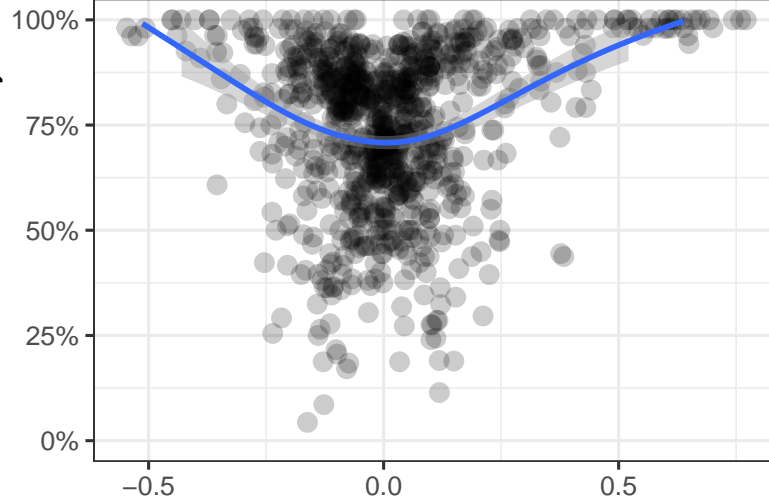

UGA ACT Data

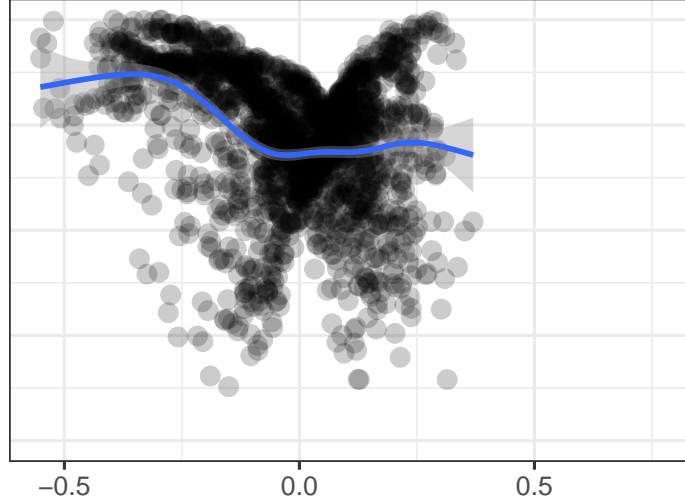

Distance from Median Impression
