# Supplementary material
Source: ML conference proceedings conference paper supplement (https://aclanthology.org/2020.acl-main.405)

Given that someone is **a mother**, what is **that same person** most likely to also be?

an adult

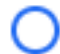

a sister

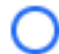

a son

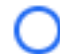

all are equally  
(un)likely

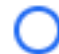

a lady

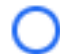

Supplement: Dataset [file 2020.acl-main.405.Dataset.zip]
