# Supplementary material
Source: ML conference proceedings conference paper supplement (https://aclanthology.org/2020.acl-main.405)

**A**Coefficient in  
Figure 3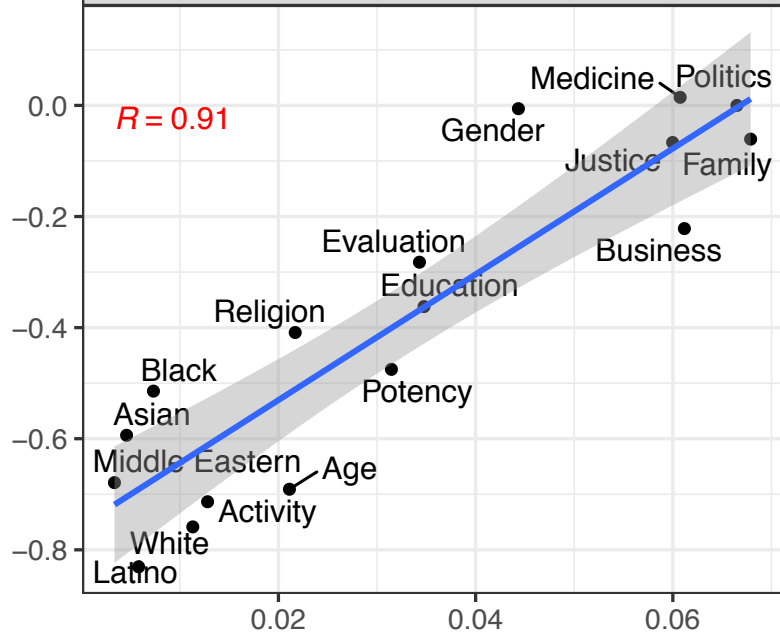**B**Maximum Importance  
in IsA or SeenWith  
Labeling Questions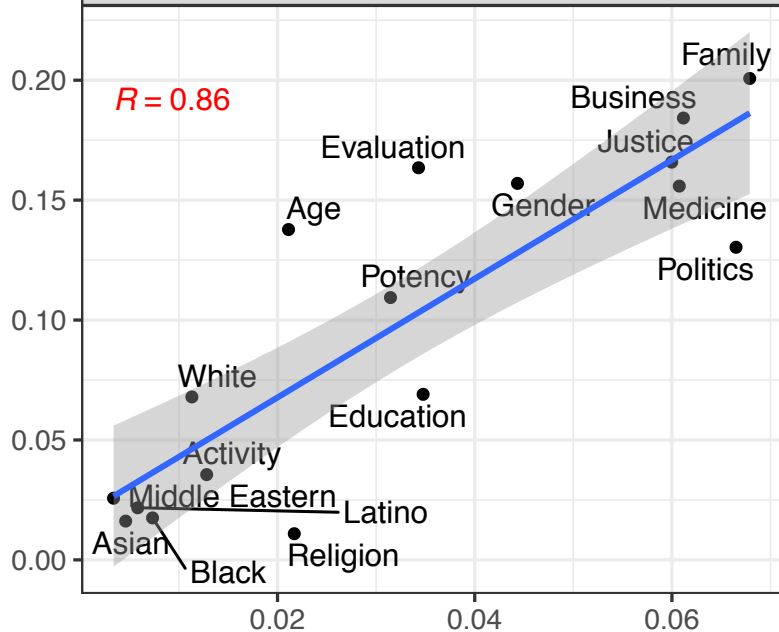

Variance

Supplement: Dataset [file 2020.acl-main.405.Dataset.zip]

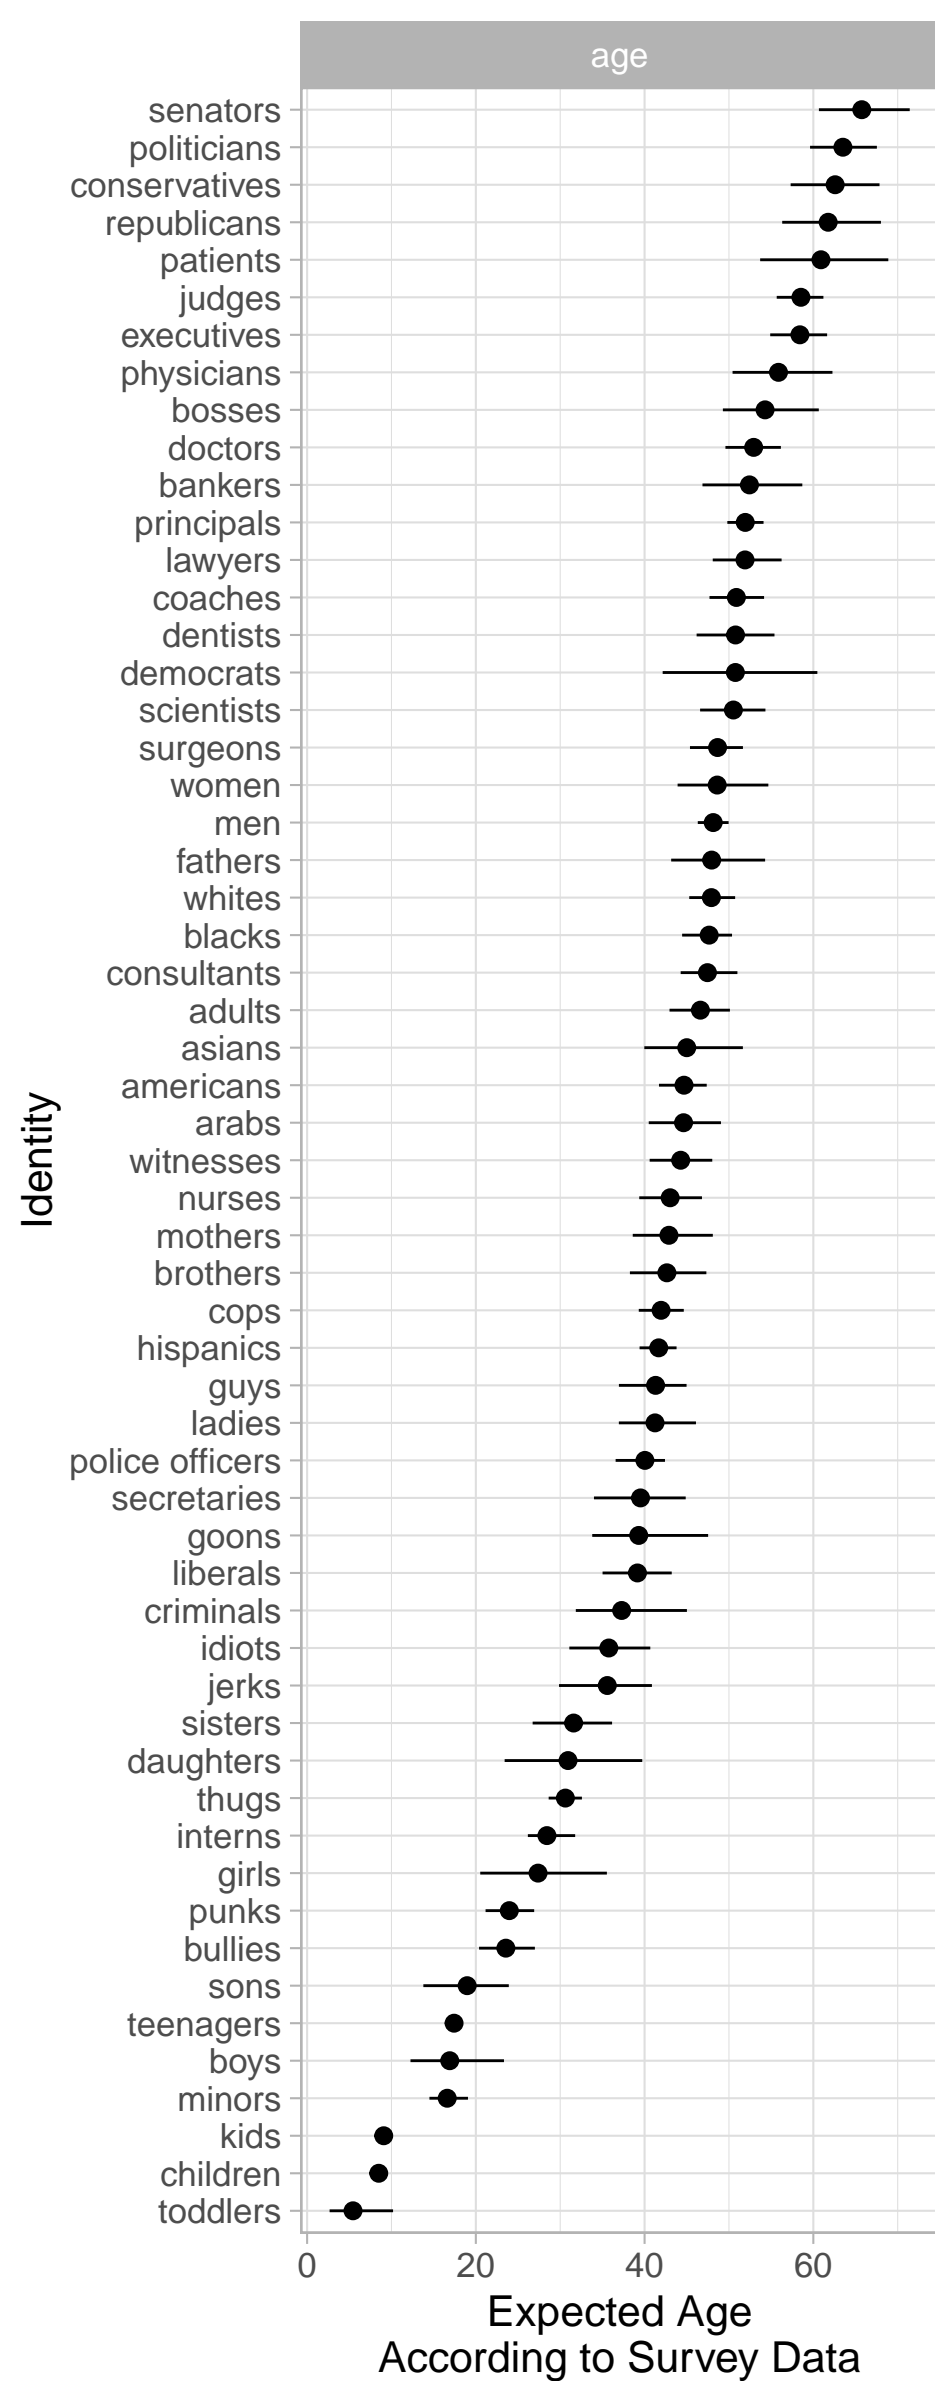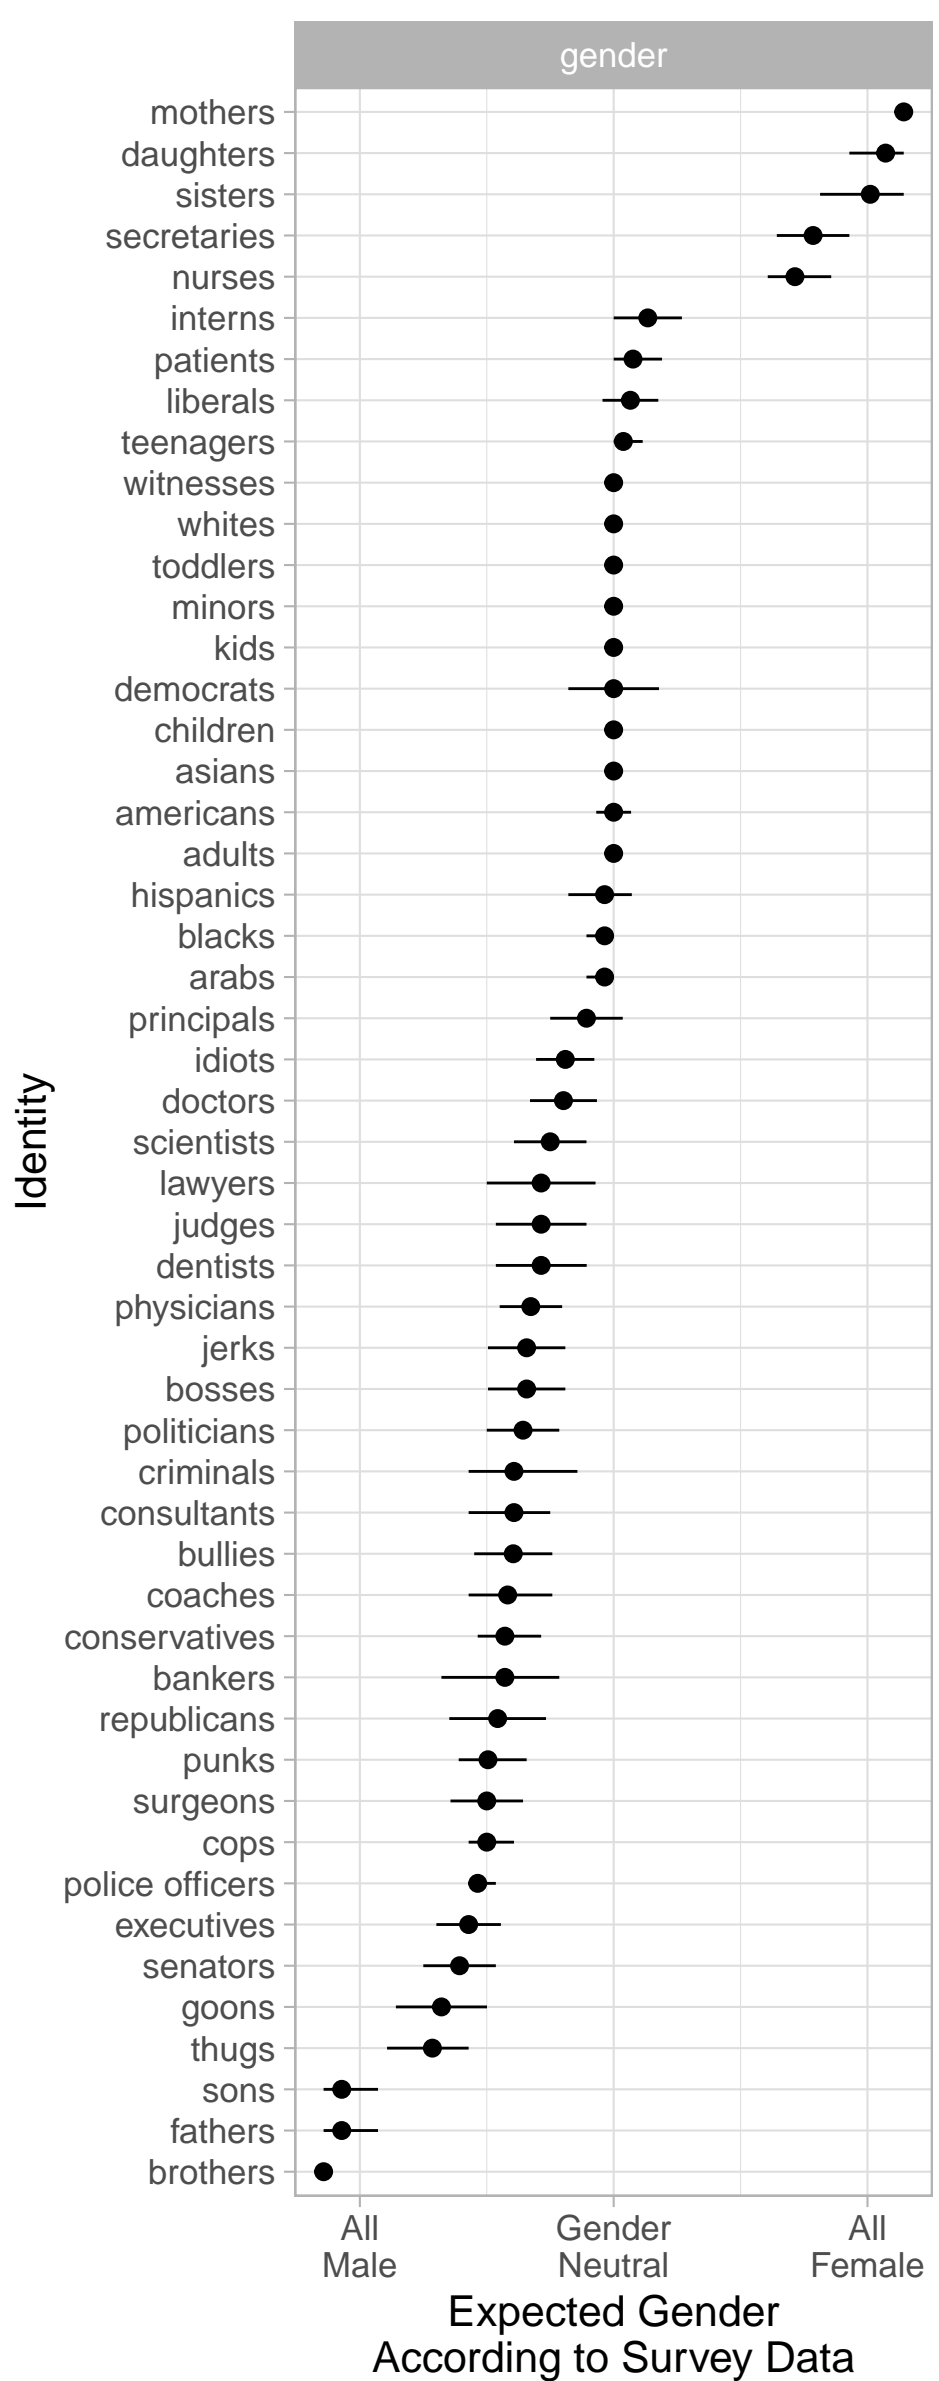

Supplement: Dataset [file 2020.acl-main.405.Dataset.zip]

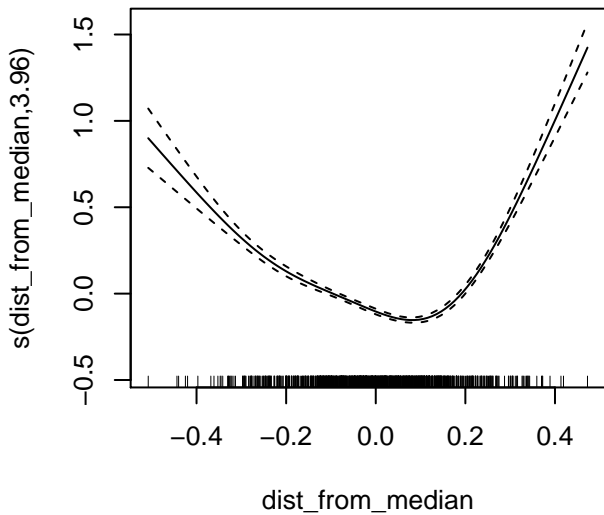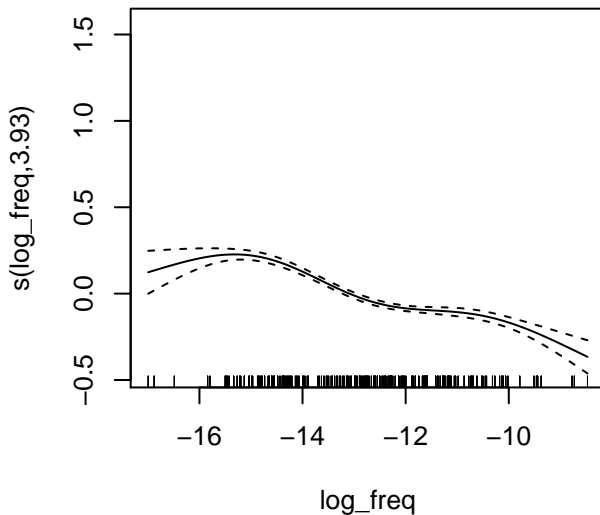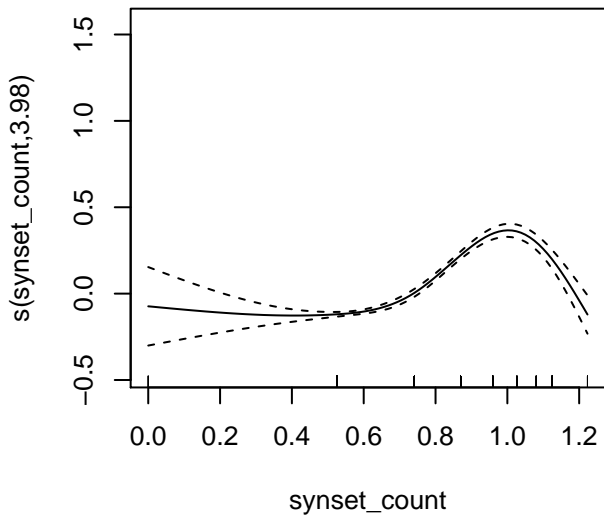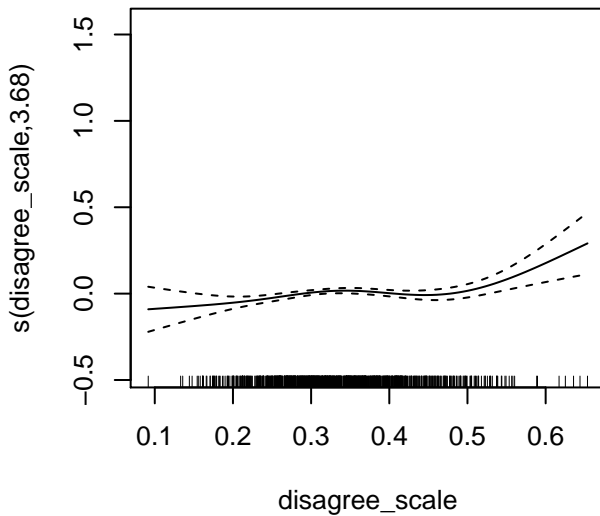

Supplement: Dataset [file 2020.acl-main.405.Dataset.zip]

Coefficient for SeenWith Questions

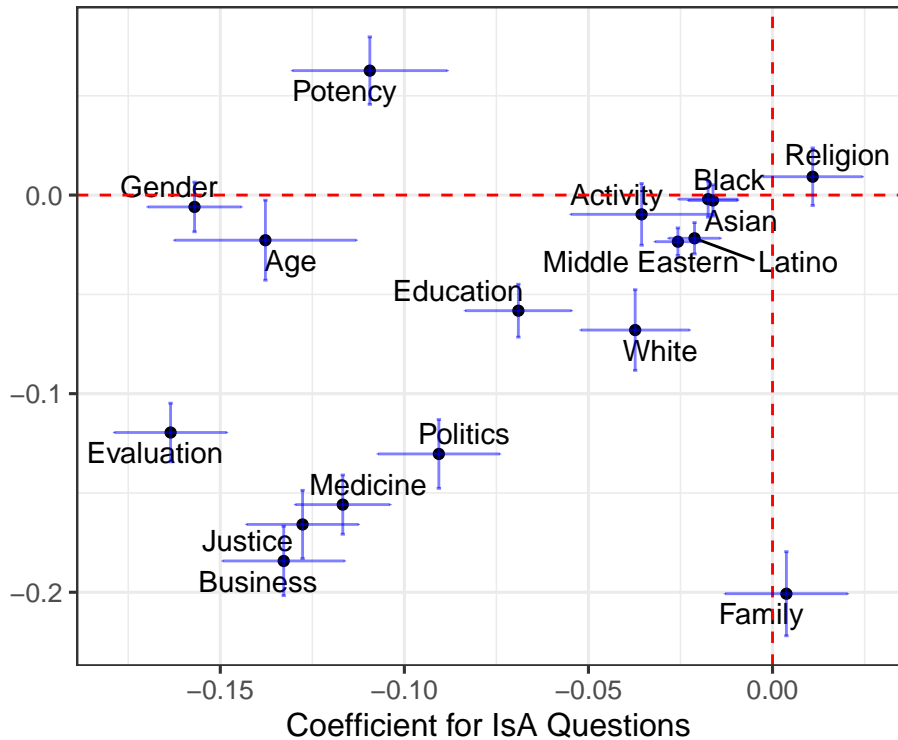

Supplement: Dataset [file 2020.acl-main.405.Dataset.zip]

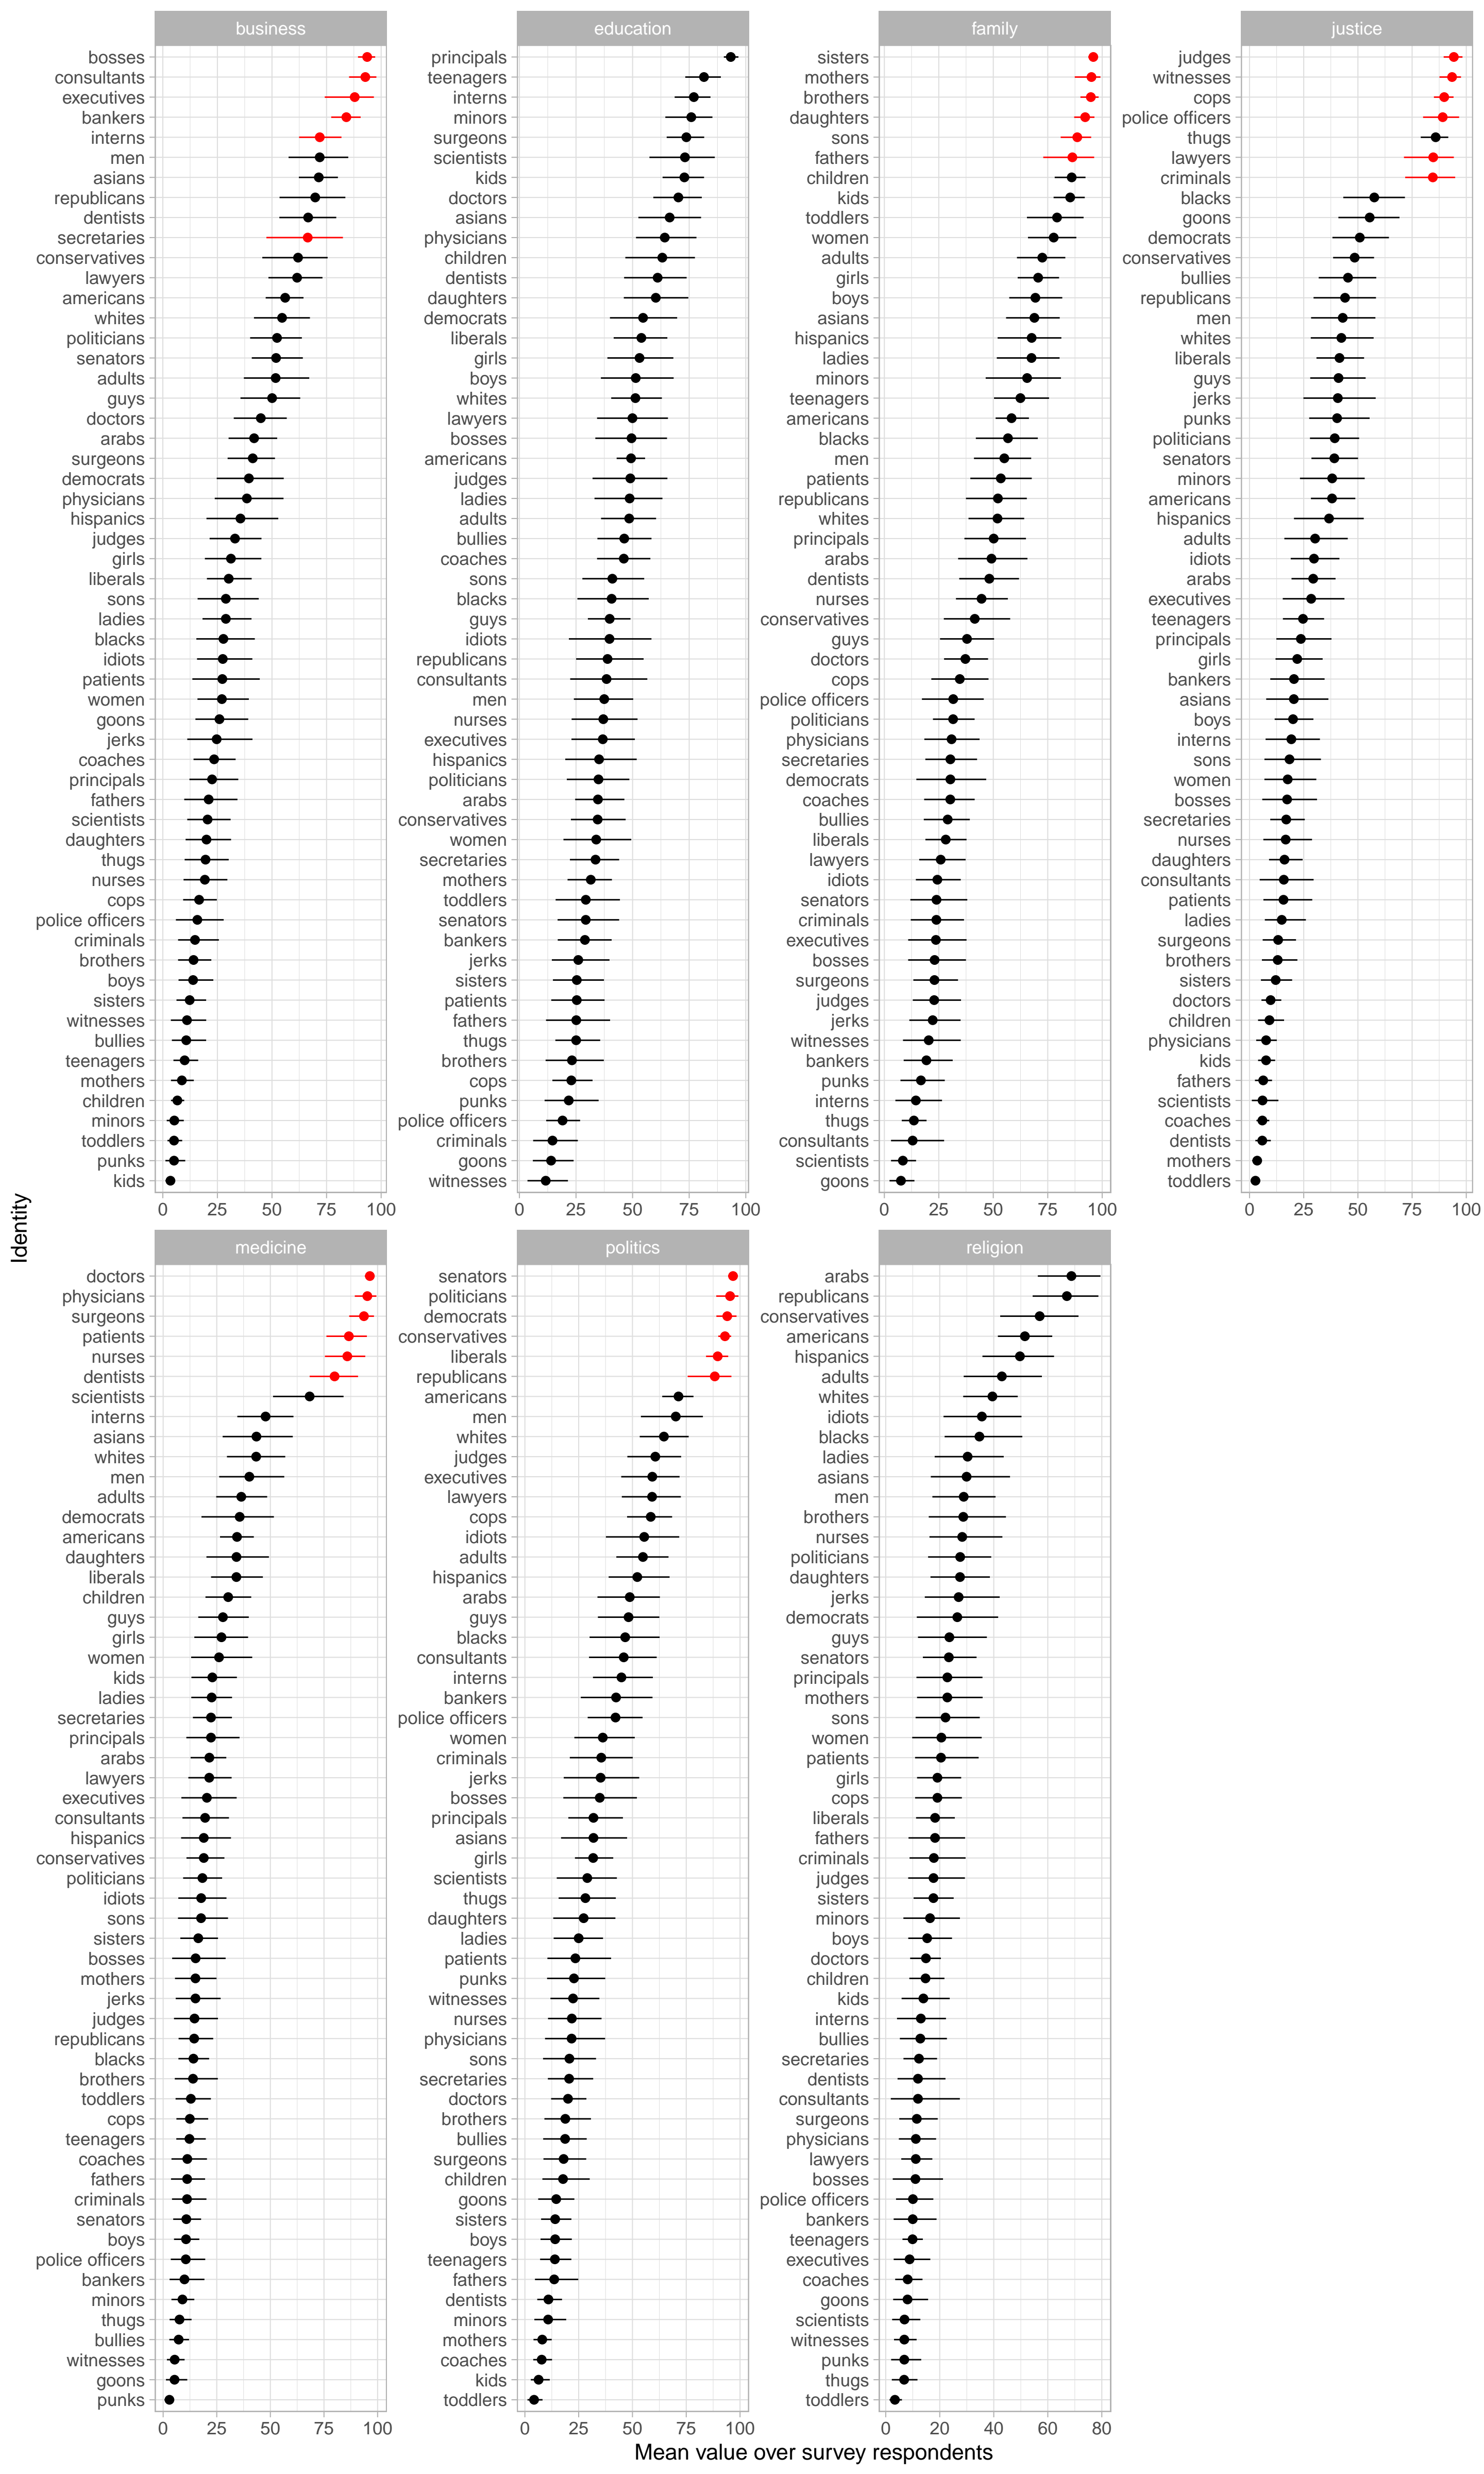

Supplement: Dataset [file 2020.acl-main.405.Dataset.zip]

Pearson Corr b/t  
Survey & Embedding

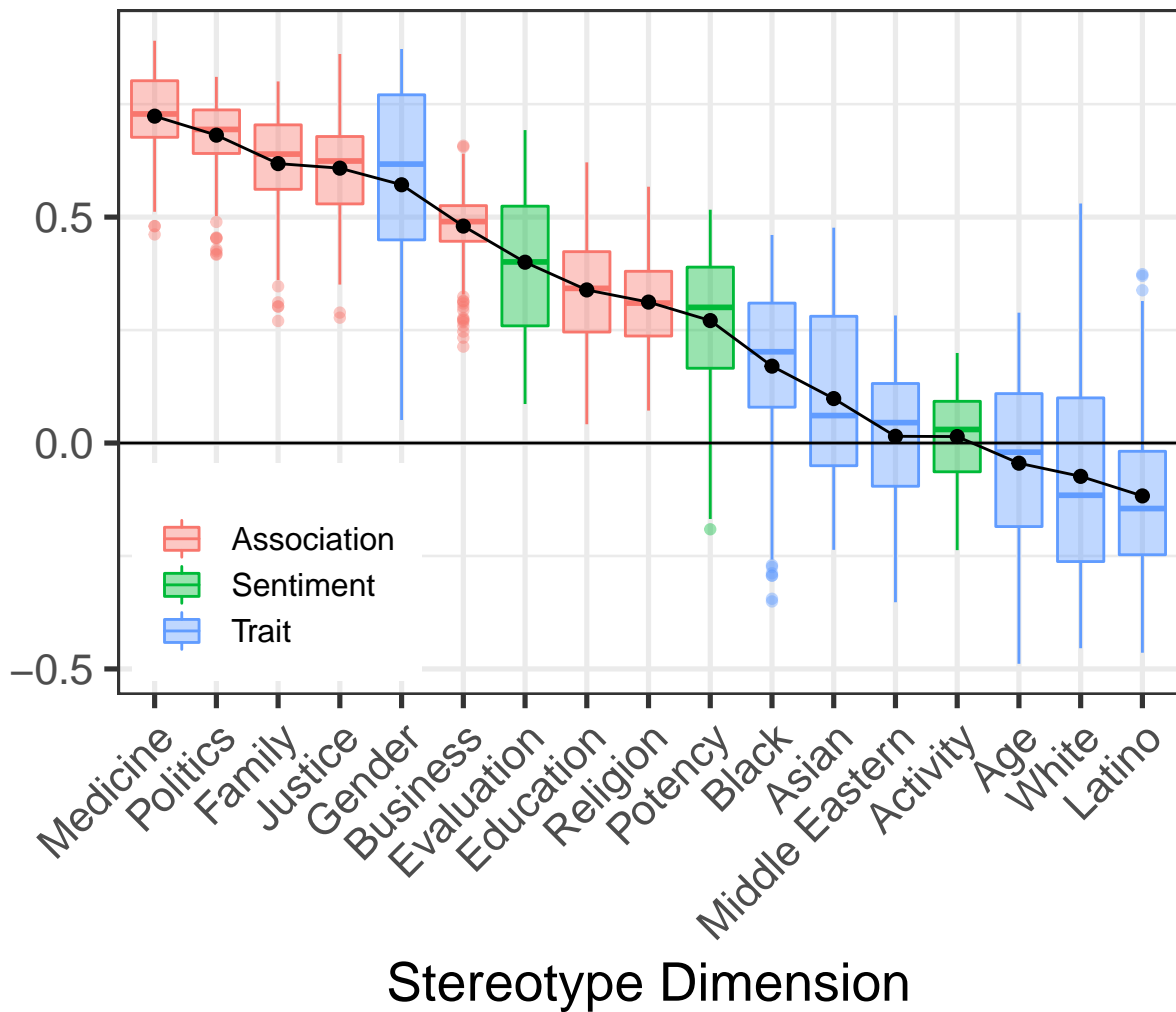

Supplement: Dataset [file 2020.acl-main.405.Dataset.zip]

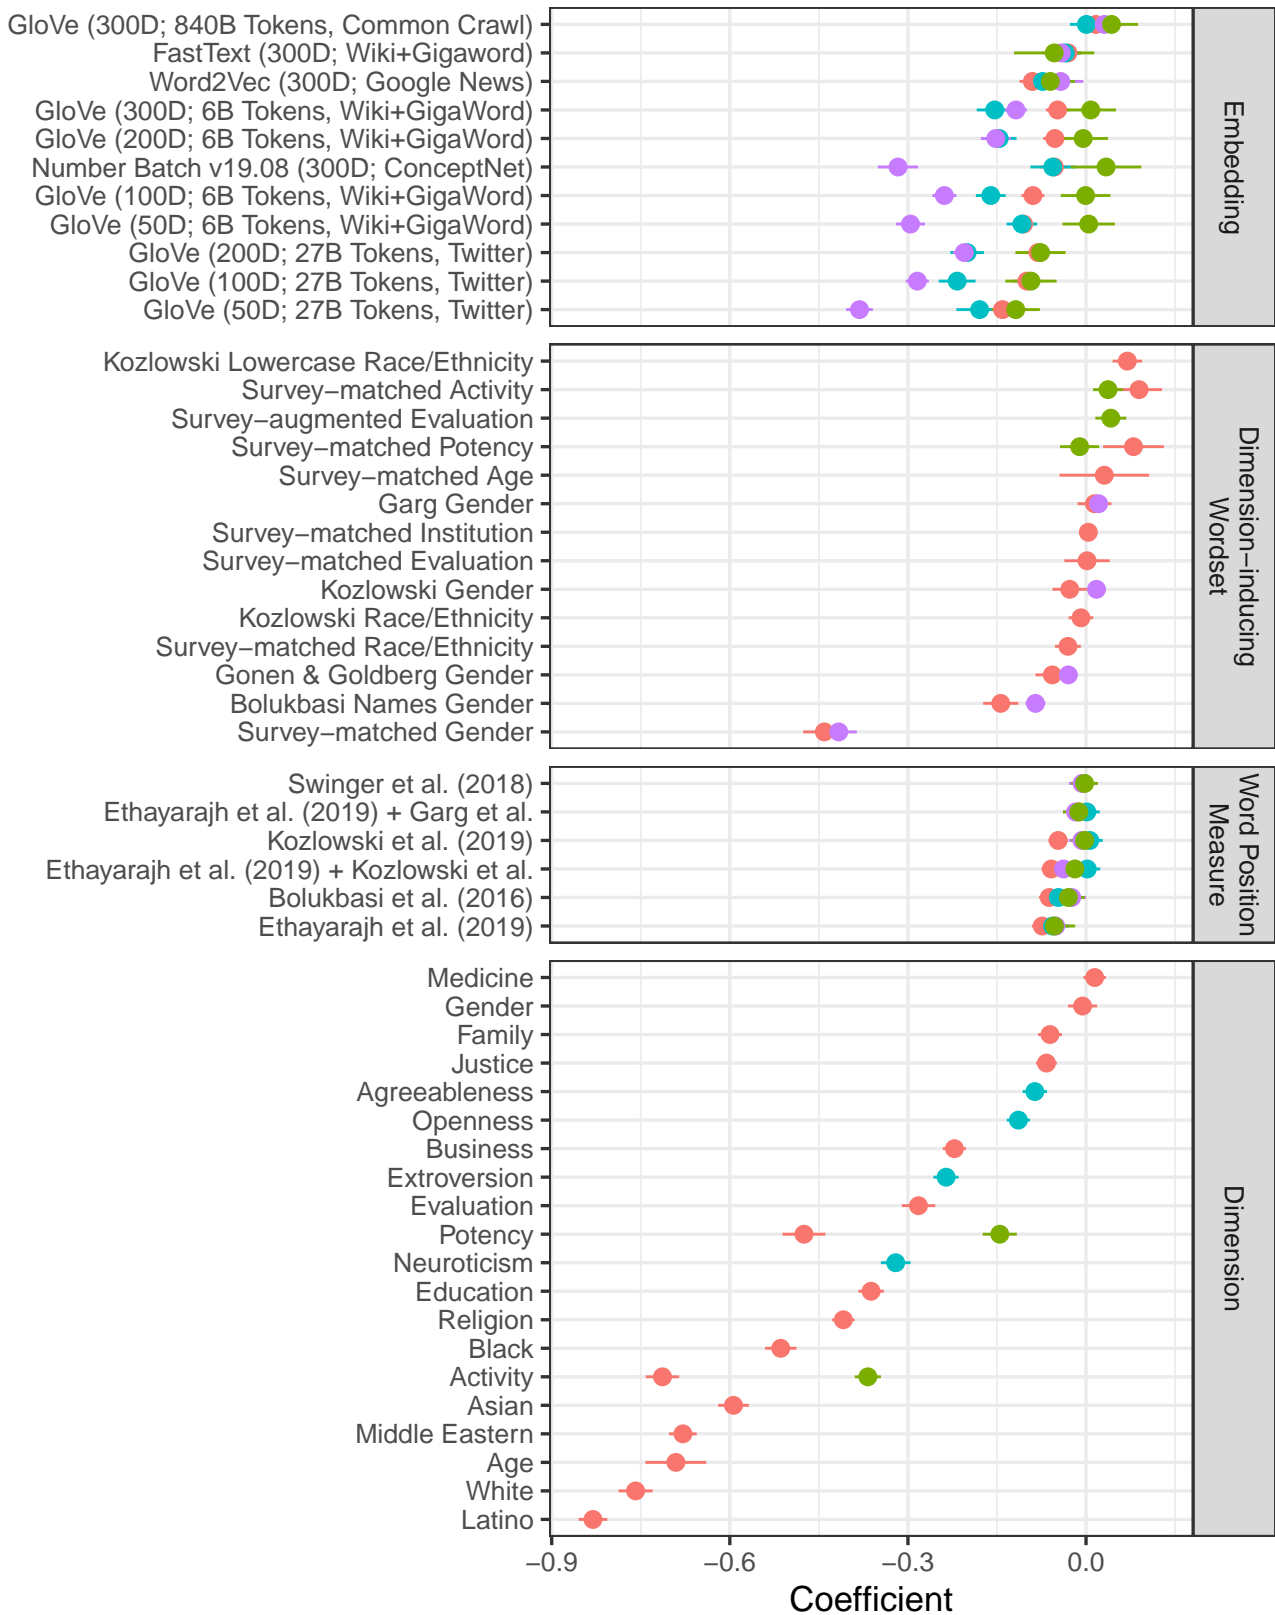

Supplement: Dataset [file 2020.acl-main.405.Dataset.zip]

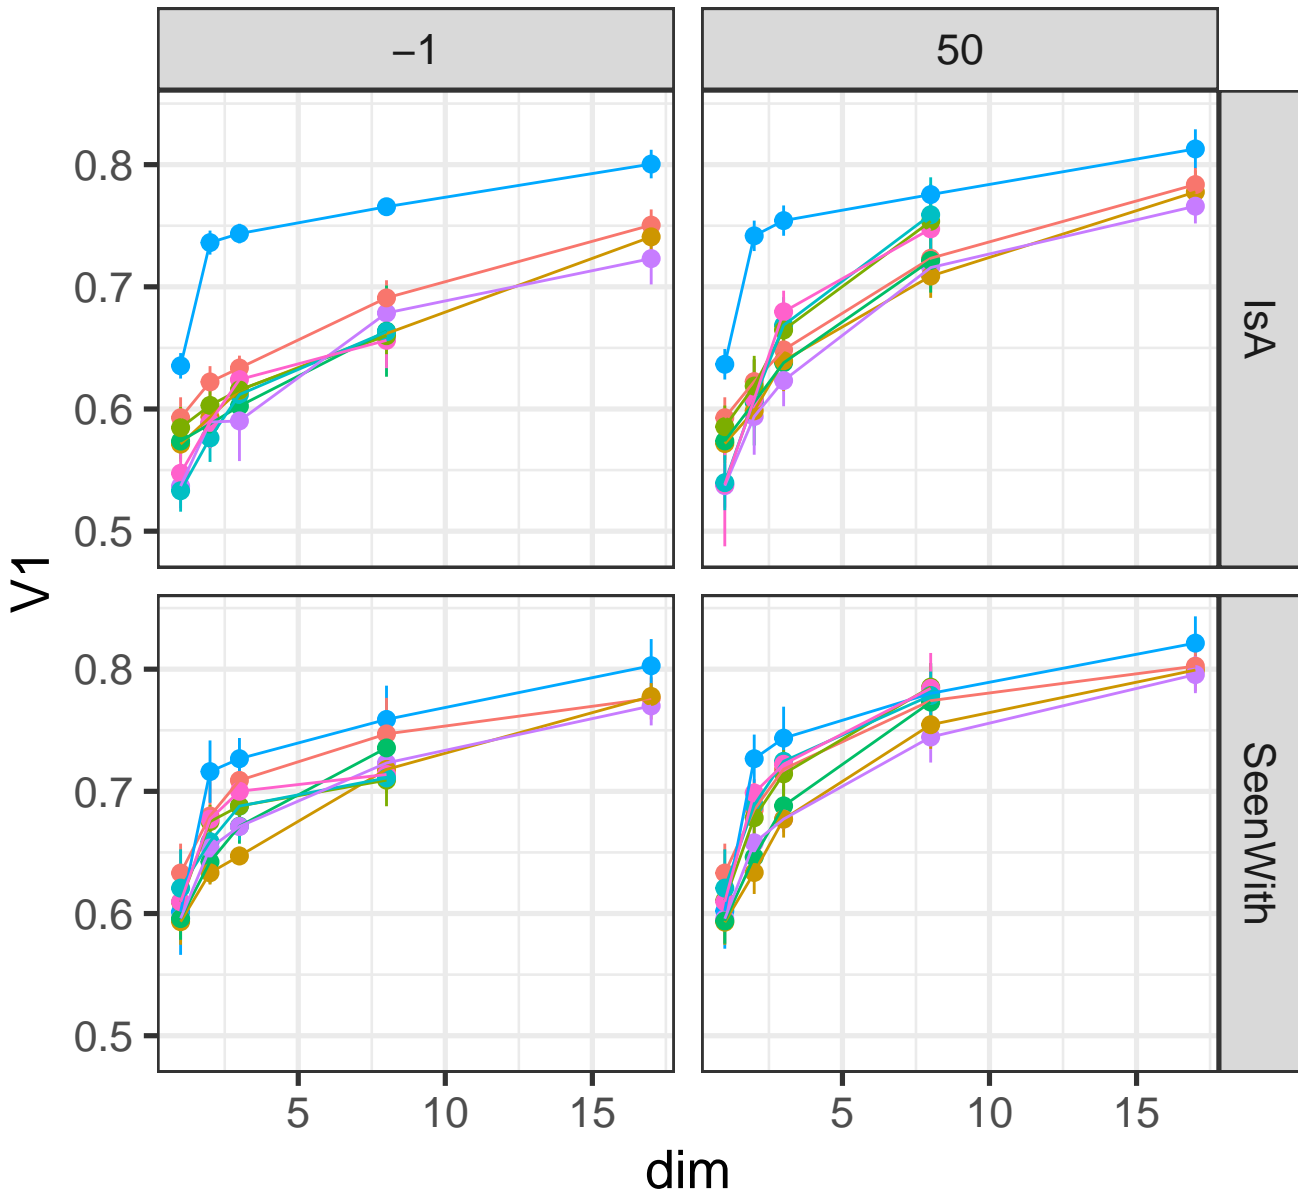

Supplement: Dataset [file 2020.acl-main.405.Dataset.zip]

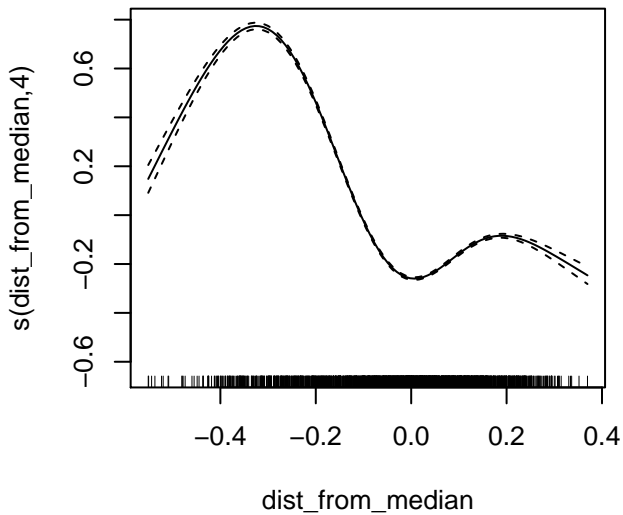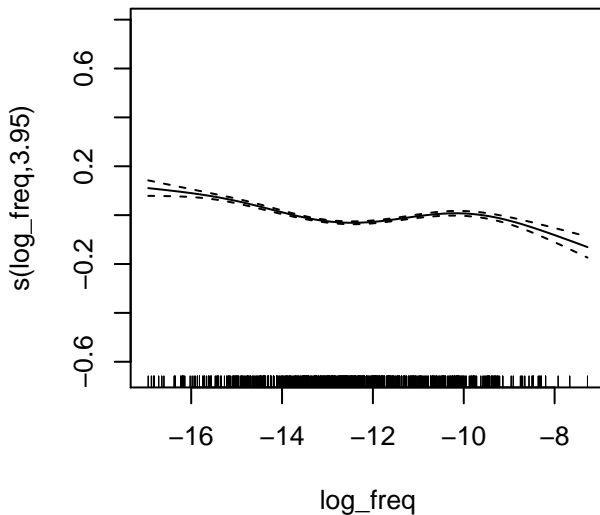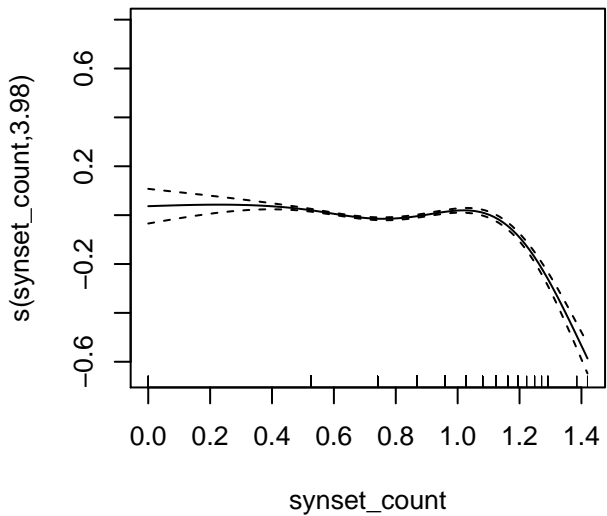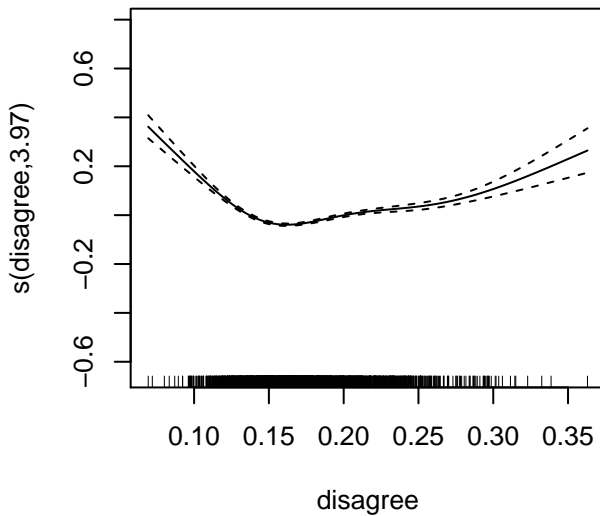

Supplement: Dataset [file 2020.acl-main.405.Dataset.zip]

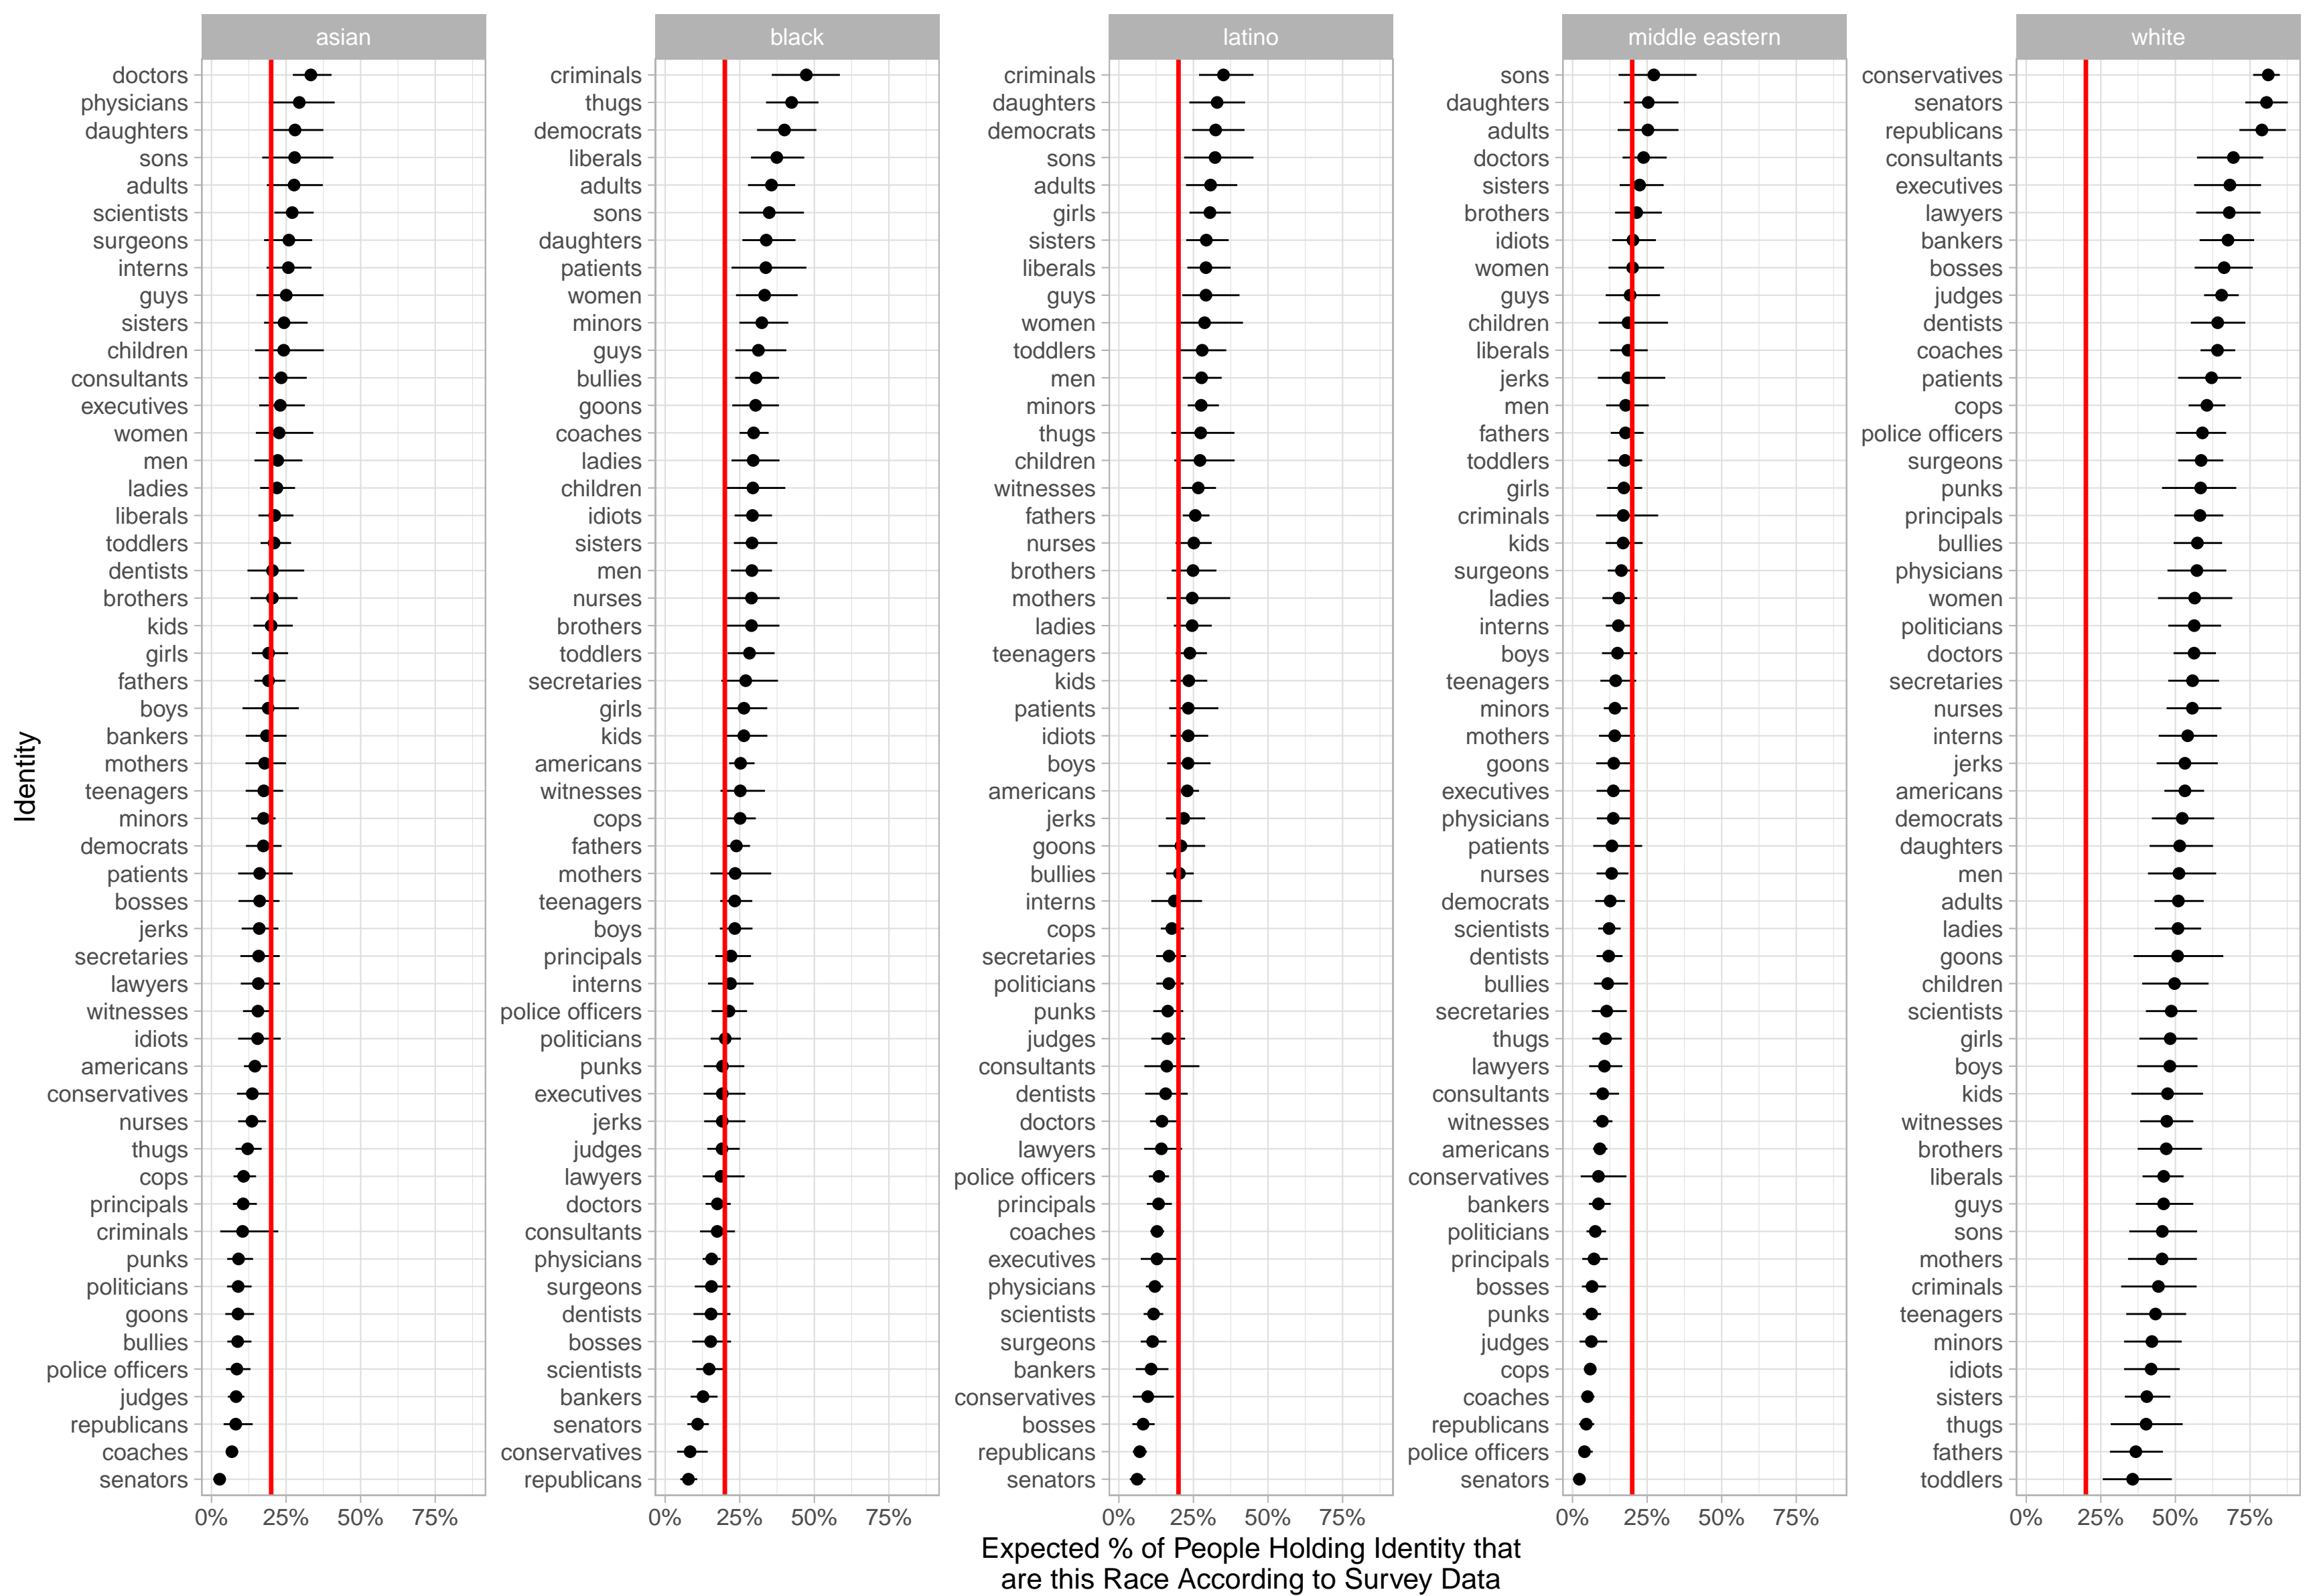

Supplement: Dataset [file 2020.acl-main.405.Dataset.zip]

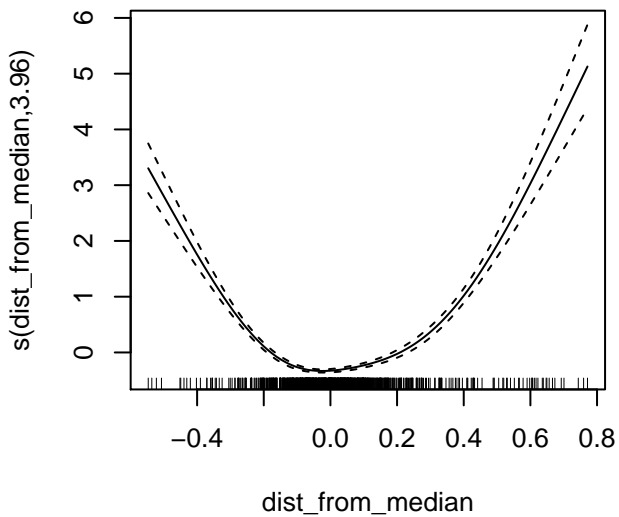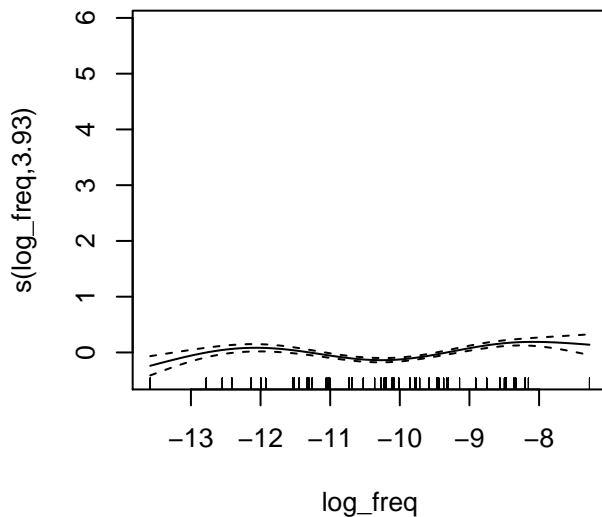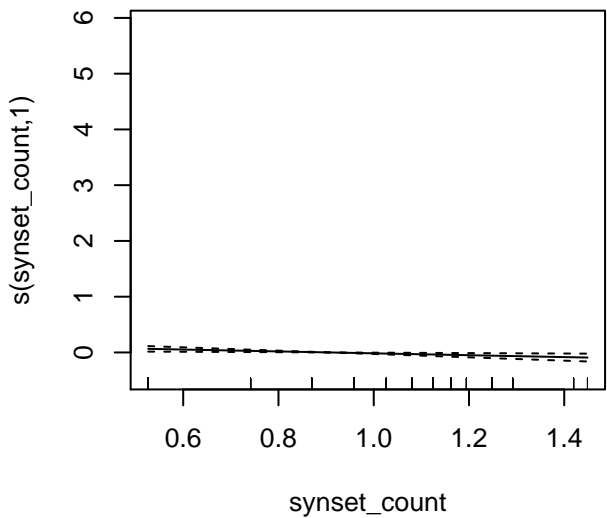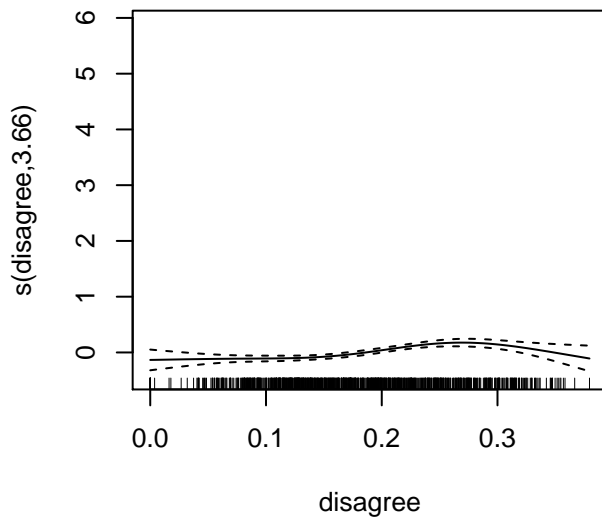

Supplement: Dataset [file 2020.acl-main.405.Dataset.zip]

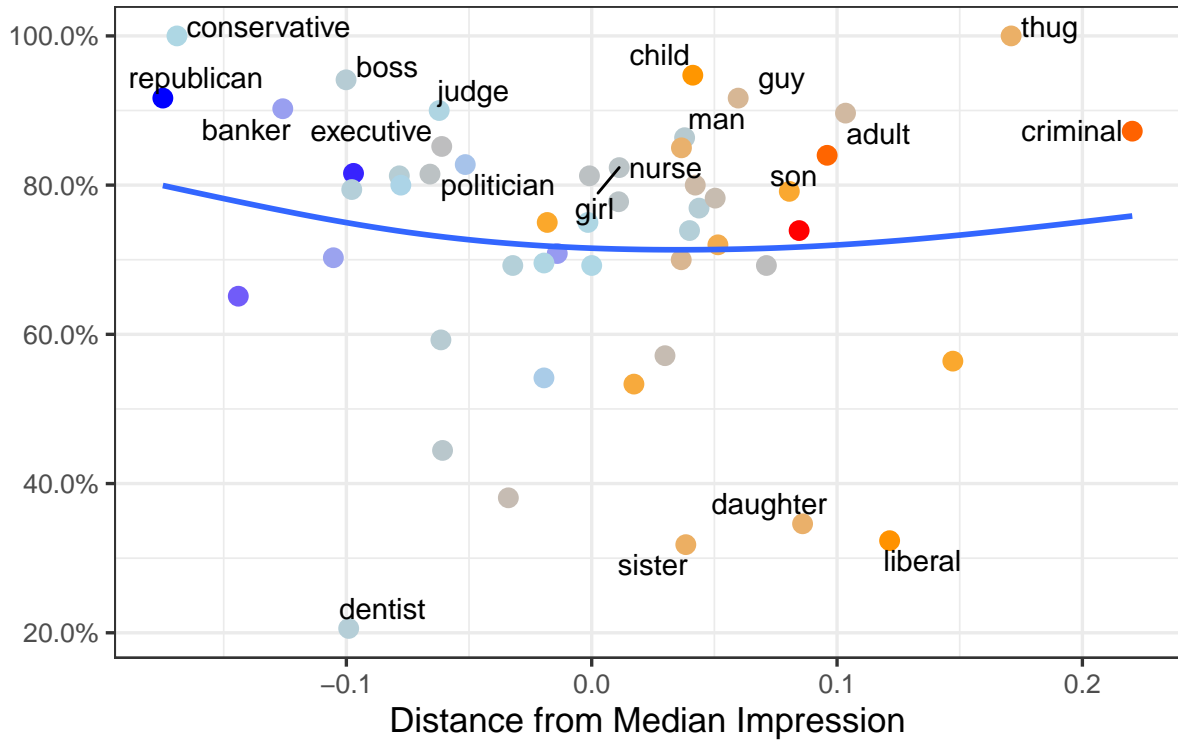

Supplement: Dataset [file 2020.acl-main.405.Dataset.zip]

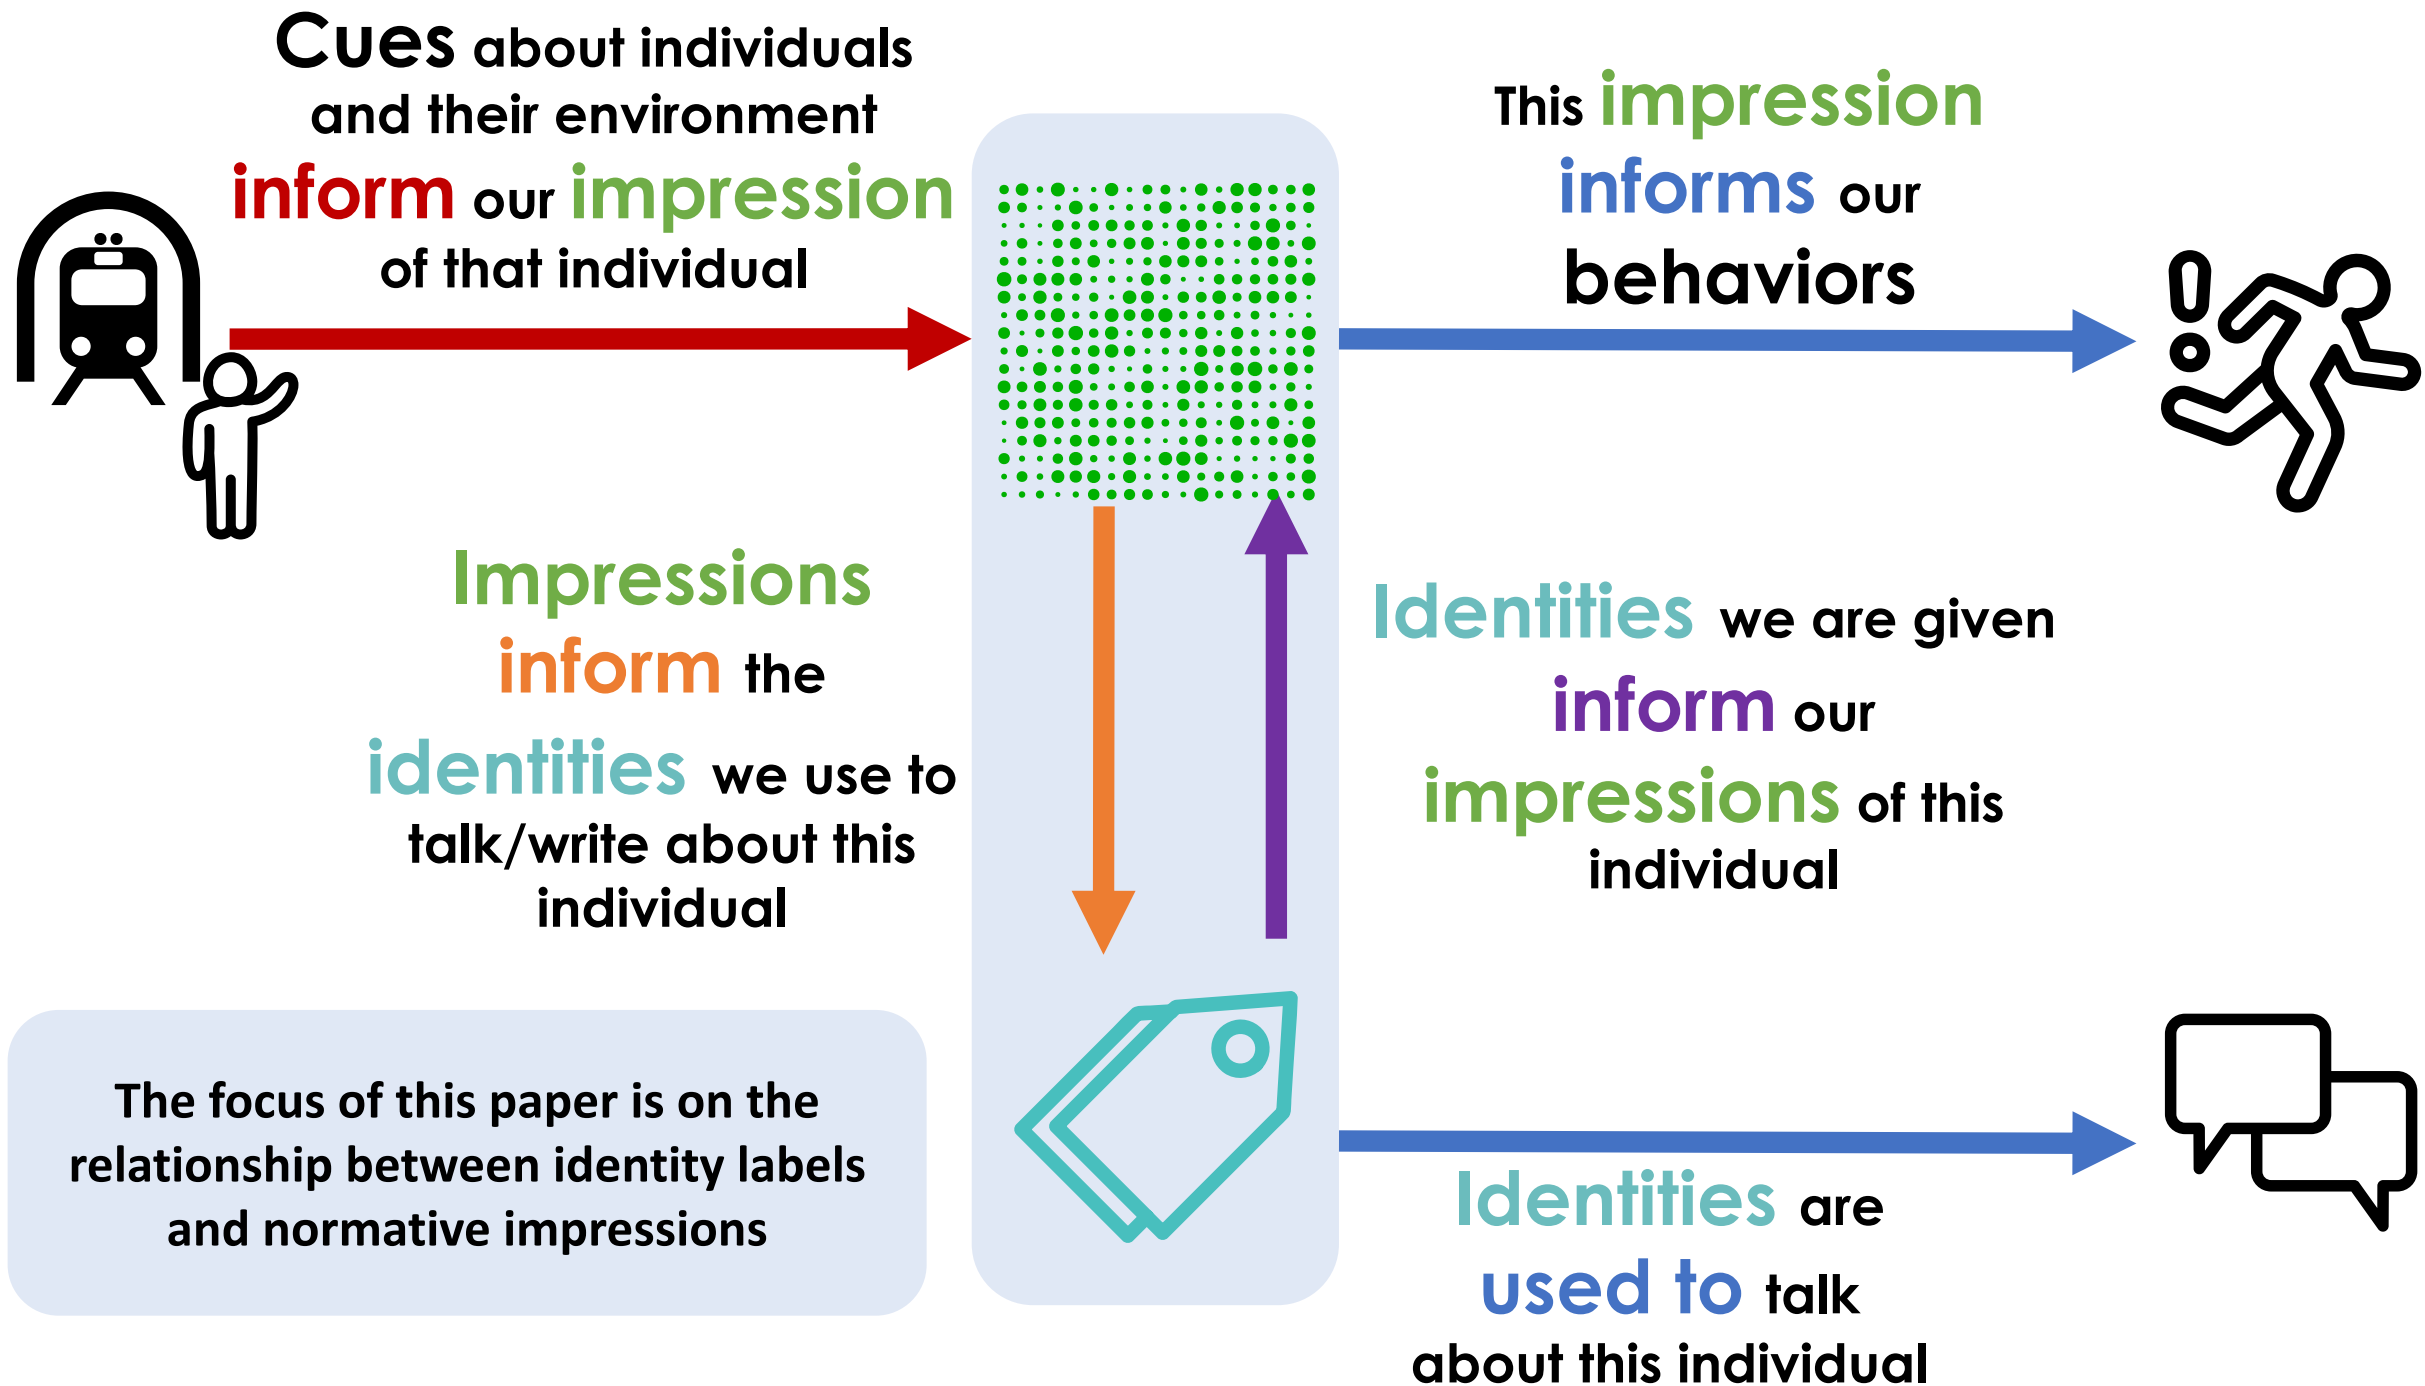

Supplement: Dataset [file 2020.acl-main.405.Dataset.zip]

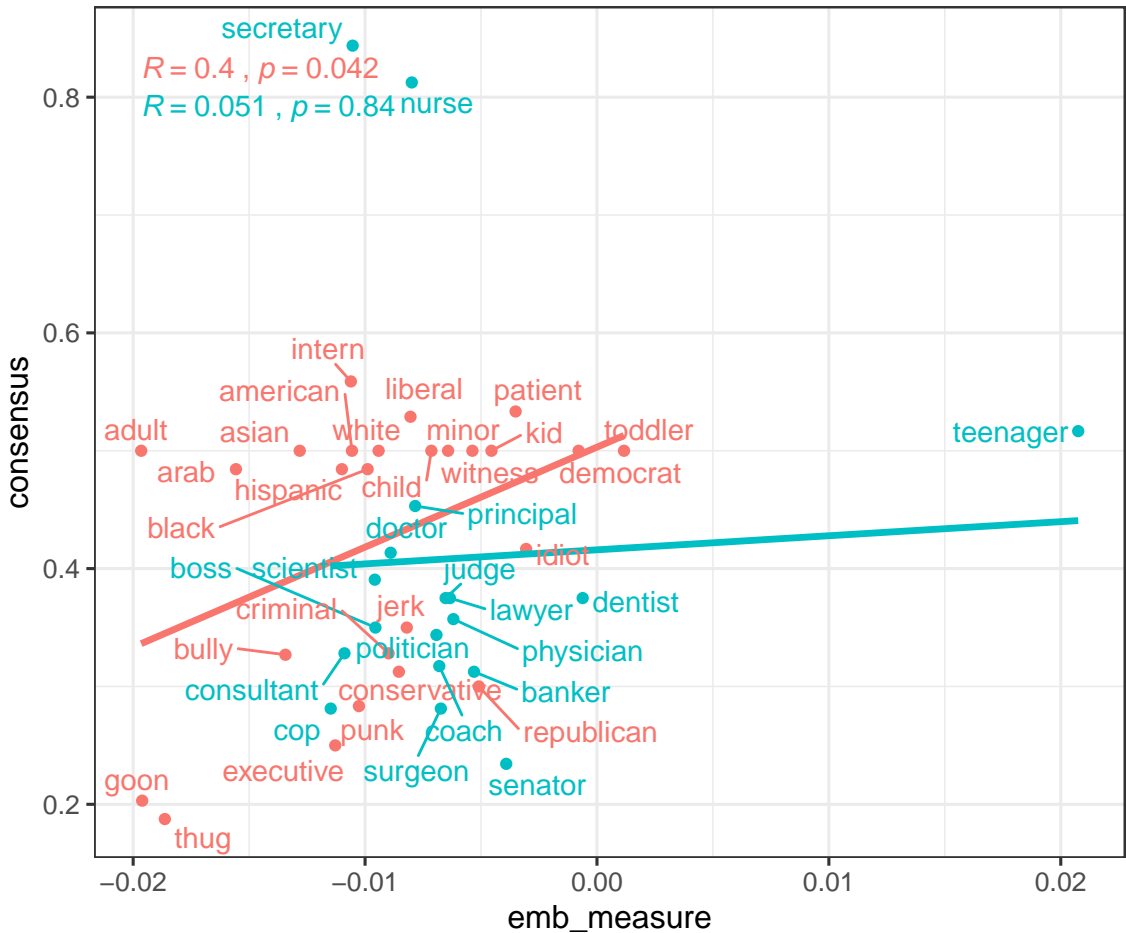

Supplement: Dataset [file 2020.acl-main.405.Dataset.zip]

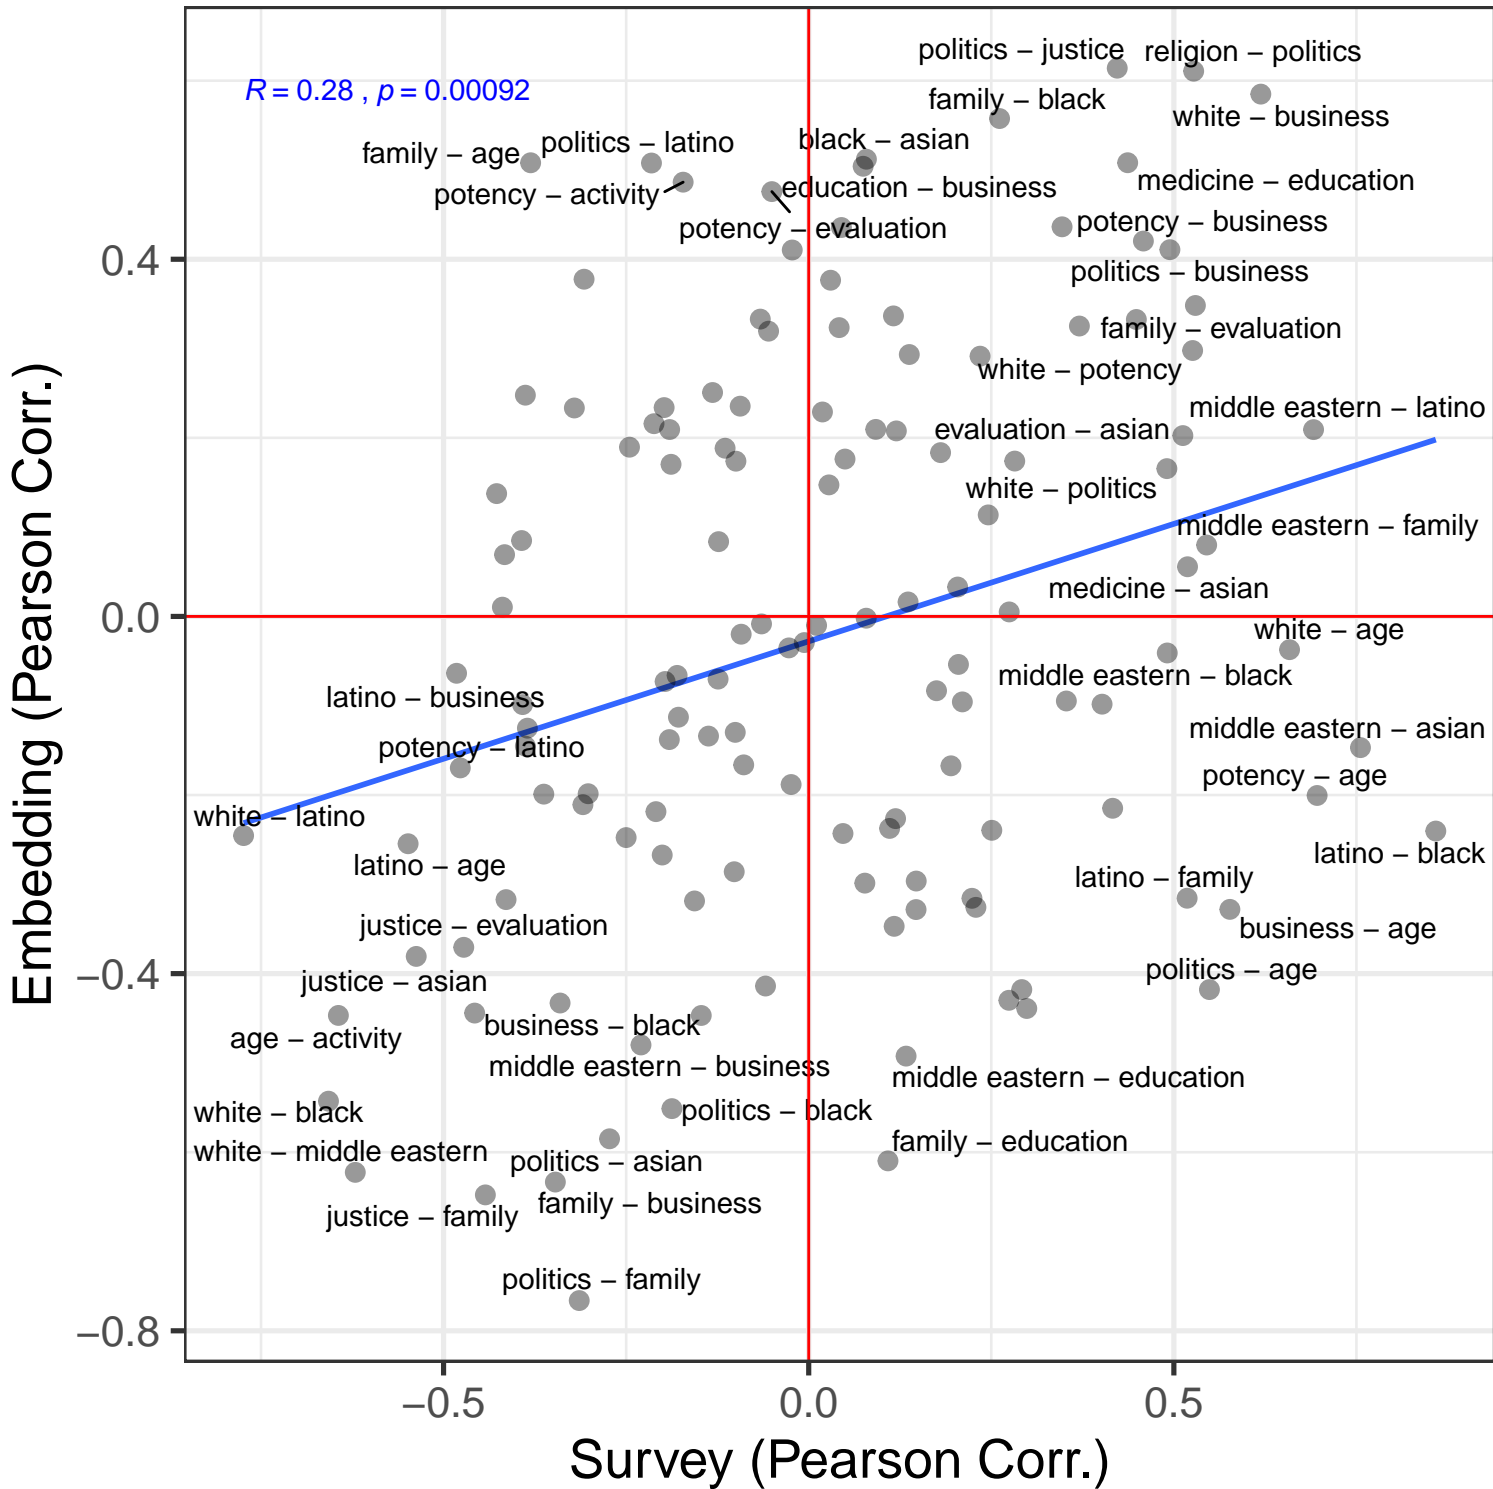

Supplement: Dataset [file 2020.acl-main.405.Dataset.zip]

**A**Coefficient in  
Figure 3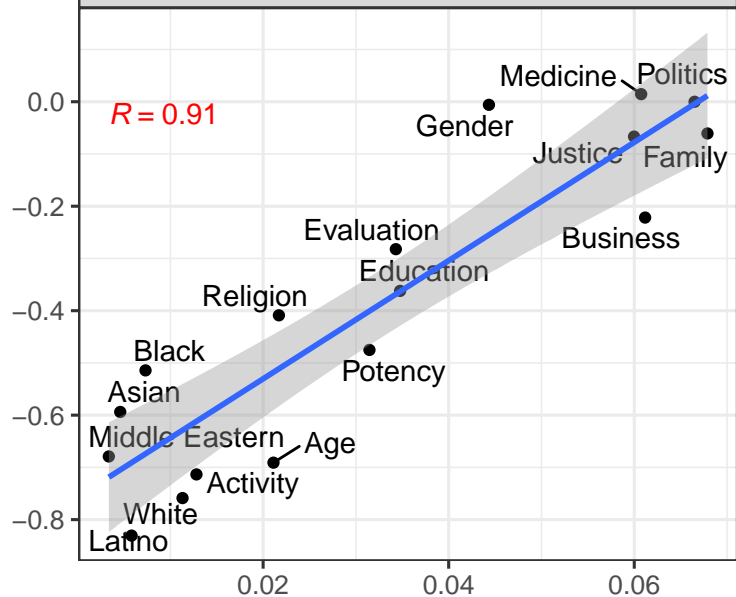**B**Maximum Importance  
in IsA or SeenWith  
Labeling Questions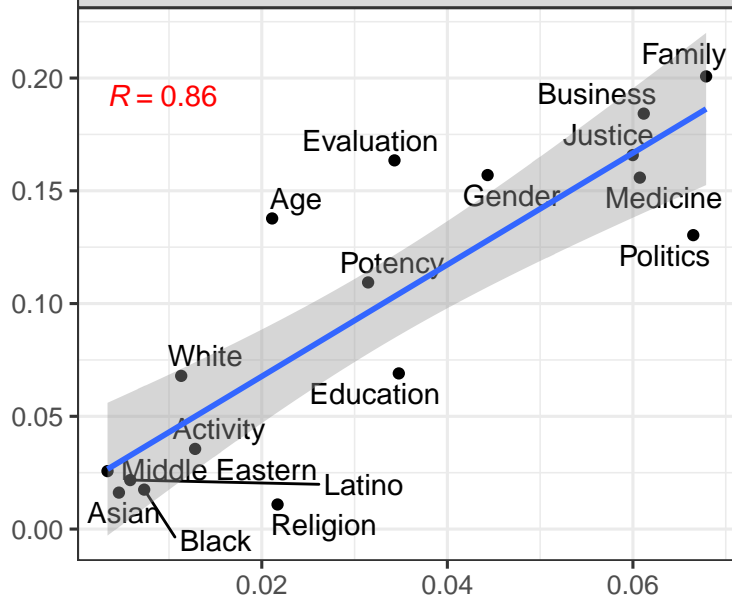

Variance

Supplement: Dataset [file 2020.acl-main.405.Dataset.zip]

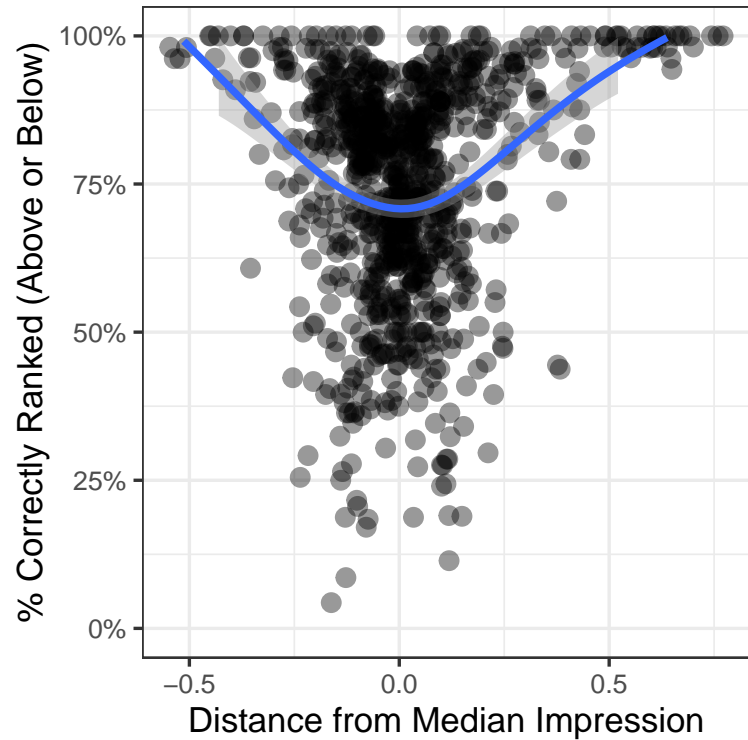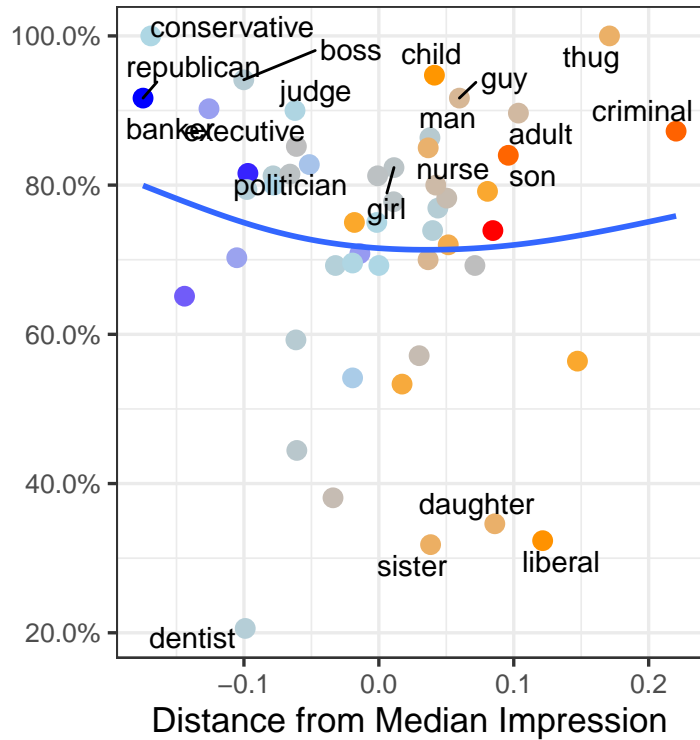

Supplement: Dataset [file 2020.acl-main.405.Dataset.zip]

Identity

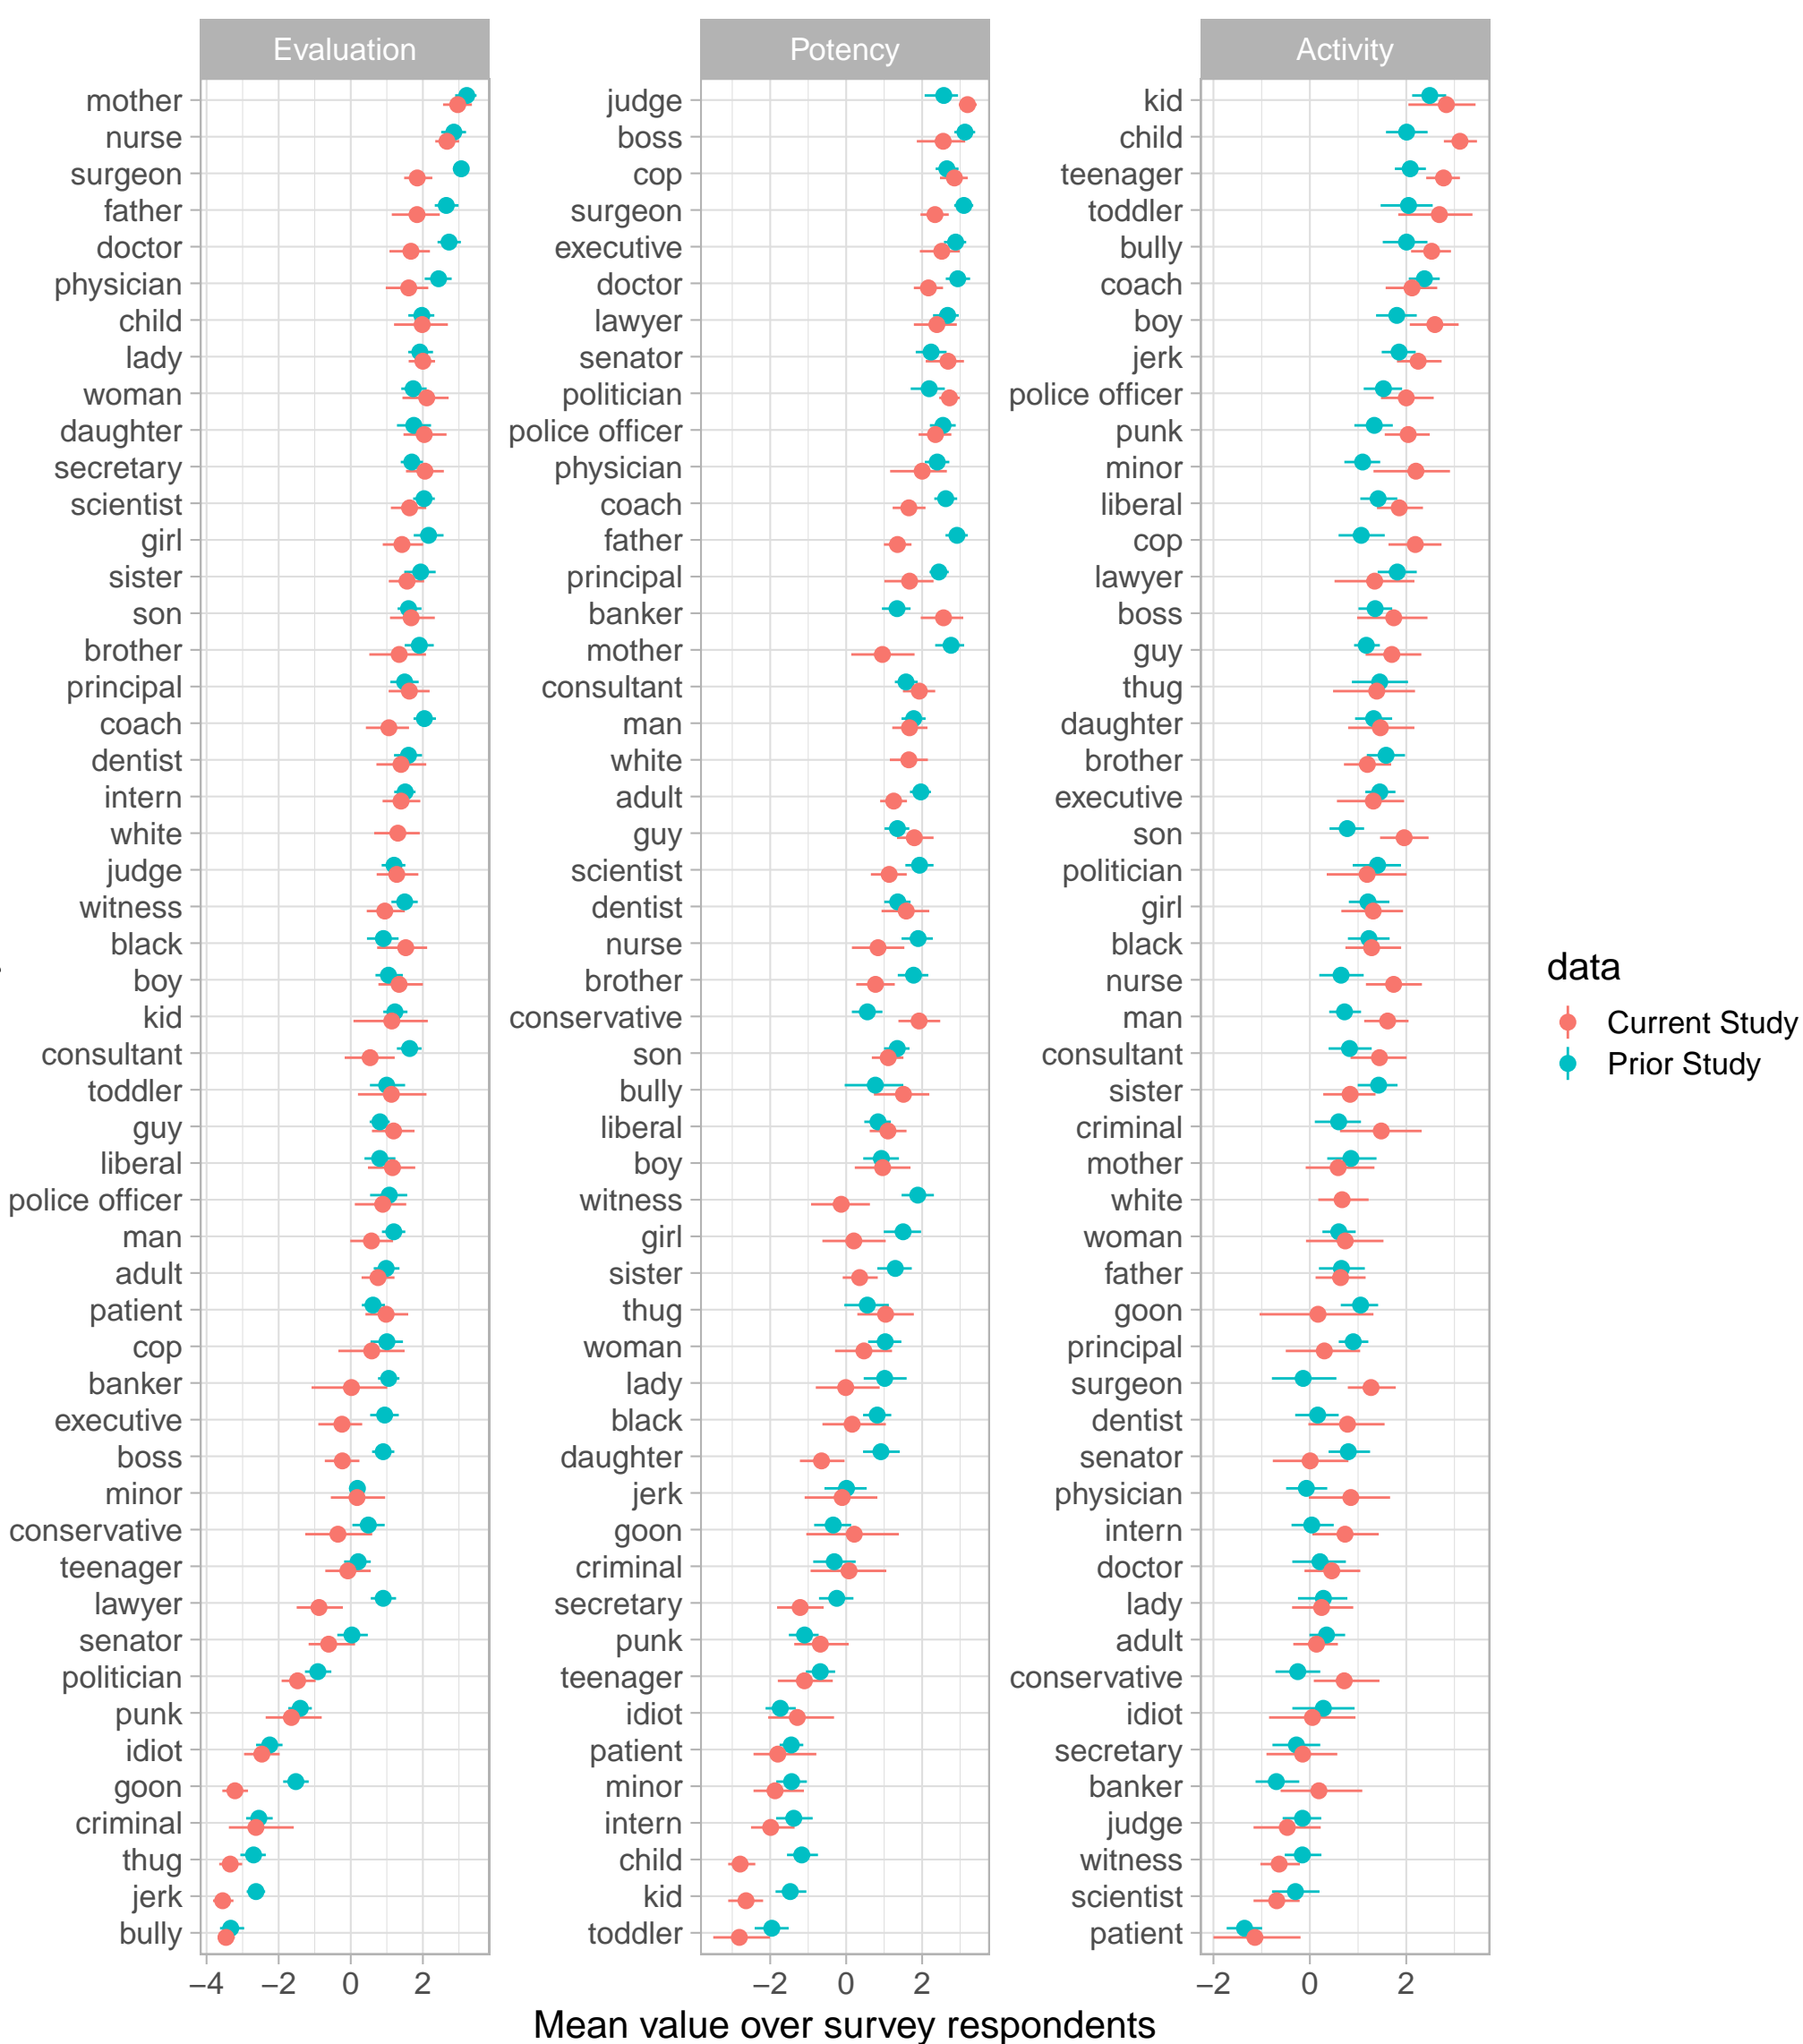

Supplement: Dataset [file 2020.acl-main.405.Dataset.zip]

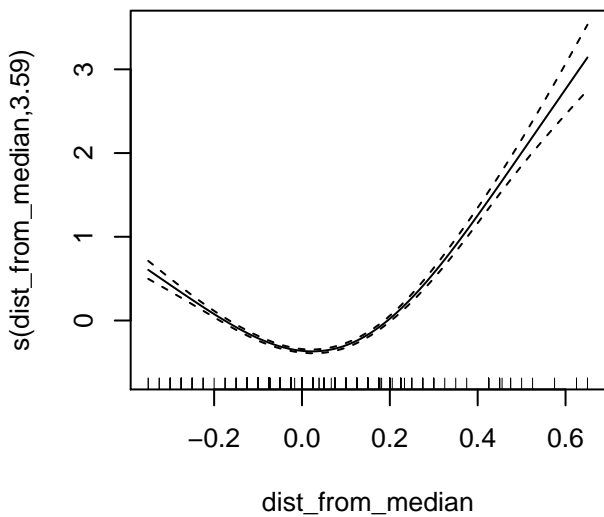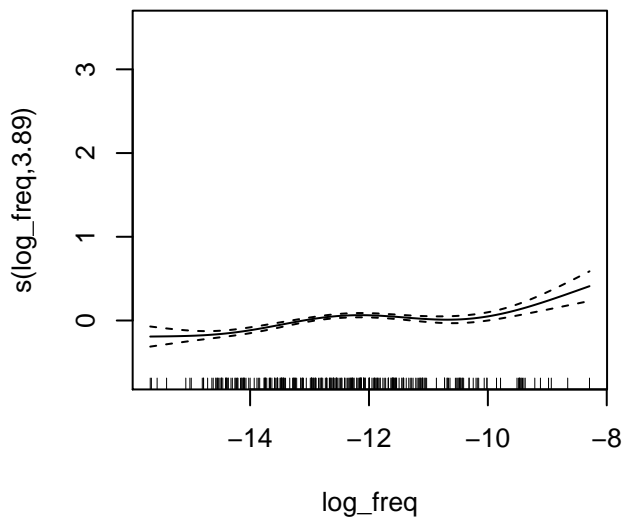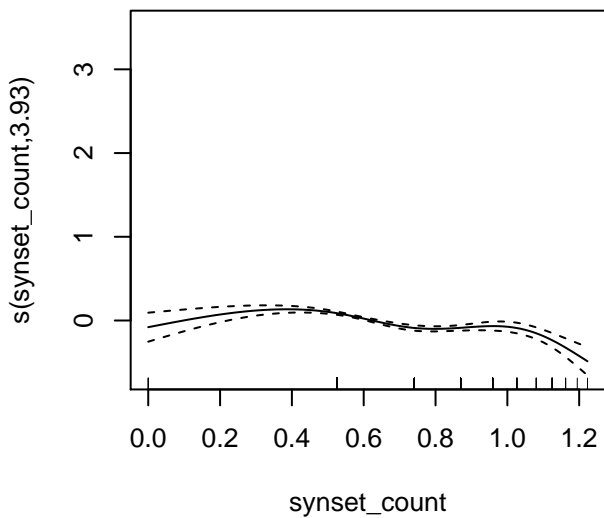

Supplement: Dataset [file 2020.acl-main.405.Dataset.zip]
